# Supplementary material for: Experiences of Australian men diagnosed with advanced prostate cancer: a qualitative study
Source: PubMed Central journal article supplement — BMJ Open. 2018 Feb 17;8(2):e019917. doi: 10.1136/bmjopen-2017-019917 (PMC5855292; doi:10.1136/bmjopen-2017-019917), 2018-02-17
Supplement: bmjopen-2017-019917.draft_revisions.pdf [file bmjopen-2017-019917.draft_revisions.pdf]

# BMJ Open

BMJ Open is committed to open peer review. As part of this commitment we make the peer review history of every article we publish publicly available.

When an article is published we post the peer reviewers' comments and the authors' responses online. We also post the versions of the paper that were used during peer review. These are the versions that the peer review comments apply to.

The versions of the paper that follow are the versions that were submitted during the peer review process. They are not the versions of record or the final published versions. They should not be cited or distributed as the published version of this manuscript.

BMJ Open is an open access journal and the full, final, typeset and author-corrected version of record of the manuscript is available on our site with no access controls, subscription charges or pay-per-view fees (<http://bmjopen.bmj.com>).

If you have any questions on BMJ Open's open peer review process please email [info.bmjopen@bmj.com](mailto:info.bmjopen@bmj.com)

# BMJ Open

## The experiences of men diagnosed with advanced prostate cancer: a qualitative study

|                               |                                                                                                                                                                                                                                                                                                                                                                                                                                                                                                                                                                                                               |
|-------------------------------|---------------------------------------------------------------------------------------------------------------------------------------------------------------------------------------------------------------------------------------------------------------------------------------------------------------------------------------------------------------------------------------------------------------------------------------------------------------------------------------------------------------------------------------------------------------------------------------------------------------|
| Journal:                      | <i>BMJ Open</i>                                                                                                                                                                                                                                                                                                                                                                                                                                                                                                                                                                                               |
| Manuscript ID                 | bmjopen-2017-019917                                                                                                                                                                                                                                                                                                                                                                                                                                                                                                                                                                                           |
| Article Type:                 | Research                                                                                                                                                                                                                                                                                                                                                                                                                                                                                                                                                                                                      |
| Date Submitted by the Author: | 07-Oct-2017                                                                                                                                                                                                                                                                                                                                                                                                                                                                                                                                                                                                   |
| Complete List of Authors:     | Chambers, Suzanne; Griffiths University, Menzies Health Institute Queensland<br>Hyde, Melissa; Griffith University Menzies Health Institute Queensland; Cancer Council Queensland<br>Laurie, Kirstyn; Cancer Council Queensland; Griffith University Menzies Health Institute Queensland<br>Legg, Melissa; Griffith University Menzies Health Institute Queensland; Cancer Council Queensland<br>Frydenberg, Mark; Monash Health,<br>Davis, Ian; Monash University Eastern Health Clinical School<br>Lowe, Anthony; Prostate Cancer Foundation of Australia<br>Dunn, Jeff; University of Southern Queensland, |
| Keywords:                     | Prostate cancer, advanced cancer, metastatic, masculinities, supportive care needs, life course                                                                                                                                                                                                                                                                                                                                                                                                                                                                                                               |
|                               |                                                                                                                                                                                                                                                                                                                                                                                                                                                                                                                                                                                                               |

SCHOLARONE™  
Manuscripts

Only

## The experiences of men diagnosed with advanced prostate cancer: a qualitative study

Suzanne K. Chambers<sup>1,2,3,4,5,6</sup>, Melissa K. Hyde<sup>1,2</sup>, Kirstyn Laurie<sup>1,2</sup>, Melissa Legg<sup>1,2</sup>, Mark Frydenberg<sup>3,7,8</sup>, Ian D. Davis<sup>3,9,10</sup>, Anthony Lowe<sup>1,4</sup> and Jeff Dunn<sup>1,2,5</sup>.

<sup>1</sup> Menzies Health Institute Queensland, Griffith University, Southport, QLD, Australia

<sup>2</sup> Cancer Research Centre, Cancer Council Queensland, Brisbane, QLD, Australia

<sup>3</sup> Australian and New Zealand Urogenital and Prostate (ANZUP) Cancer Trials Group, Sydney, NSW, Australia

<sup>4</sup> Prostate Cancer Foundation of Australia, Sydney, NSW, Australia

<sup>5</sup> Institute for Resilient Regions, University of Southern Queensland, Toowoomba, QLD, Australia

<sup>6</sup> Health & Wellness Institute, Edith Cowan University, Perth, WA, Australia

<sup>7</sup> Department of Urology, Monash Health, Melbourne, VIC, Australia

<sup>8</sup> Department of Surgery, Faculty of Medicine, Monash University, Melbourne, VIC, Australia

<sup>9</sup> Eastern Health, Melbourne, VIC, Australia

<sup>10</sup> Monash University Eastern Health Clinical School, Melbourne, VIC, Australia

### Corresponding author

Suzanne Chambers, Menzies Health Institute Queensland, Griffith University, Gold Coast Campus, QLD 4222, AUSTRALIA. E-Mail: [suzanne.chambers@griffith.edu.au](mailto:suzanne.chambers@griffith.edu.au)

### Acknowledgements

We thank Elizabeth Eldridge and Leah Zajdlewicz for research assistance. We gratefully acknowledge the men who generously gave their time for this study.

### Funding statement

This research received no specific grant from any funding agency in the public, commercial or not-for-profit sectors. IDD is supported by an NHMRC Practitioner Fellowship (APP1102604).

### Competing interests statement

The authors declare there are no competing interests to declare.

### Data sharing statement

The authors have full control of all primary data and agree to allow the journal to review their data if requested.

**Word count:** 3,851 text not incl. tables, figures or refs (recommended not exceed 4000 max **plus** up to 5 tables or figures).

**Abstract:** 180

## Supportive care needs of men with advanced prostate cancer

**Abstract**

**Objective:** To explore men's lived experience of advanced prostate cancer (PCa) and preferences for support.

**Design:** Cross-sectional qualitative study applying open-ended surveys and interviews conducted between June and November 2016. Interviews audio-recorded, and transcribed verbatim and analysed from a phenomenological perspective.

**Setting:** Australia, nation-wide.

**Participants:** 39 men diagnosed with advanced PCa (metastatic or castration-resistant biochemical regression) were surveyed with 28 men subsequently completing a semi-structured in depth telephone interview.

**Results:** Thematic analysis of interviews identified two organising themes; lived experience and supportive care. Lived experience included 6 super-ordinate themes: regret about late diagnosis and treatment decisions; being discounted in the health system; fear/uncertainty about the future; acceptance of their situation; masculinity; and treatment effects. Supportive care included 5 super-ordinate themes: communication; care coordination; accessible care; shared experience/peer support; and involvement of their partner/family.

**Conclusions:** Life course and the health and social context of prostate cancer influence men's experiences of advanced disease. Multimodal interventions integrating peer support and specialist nurses are needed that more closely articulate with men's expressed needs.

**Strengths and limitations of this study**

- Extends previous research in men with advanced PCa to describing how masculinities, life course, and the broader social and public health context influence support needs
- Robust and transparent study method and the application of a phenomenological theoretical approach
- Valid and reliable and transferable within the Australian setting
- Cross-sectional design is a study limitation

**Keywords**

Prostate cancer, advanced cancer, metastatic, masculinities, supportive care needs, life course

## Introduction

Prostate cancer (PCa) is the second most common cancer in males with the highest incidence in Australia/New Zealand and North America<sup>1</sup>. Most men present with localised disease or disease that has spread to regional lymph nodes with the relative 5-year survival rate for these men exceeding 95%<sup>2,3</sup>. However, 1 in 5 will progress to metastatic disease<sup>4</sup>. Approximately 5% of men are diagnosed with metastatic disease and the relative 5-year survival rate for these men is only 30%<sup>3,5</sup>. The mainstay treatment for advanced PCa is androgen deprivation therapy (ADT) that typically is followed by progression to metastatic castration-resistant PCa<sup>6</sup>. Once this occurs, median survival is less than 2 years<sup>7</sup>, although recent therapeutic advancements such as abiraterone acetate and enzalutamide have shown potential for further slowing disease progression<sup>8</sup> with median survival up to 3 years<sup>6</sup>. The STAMPEDE<sup>9</sup> and LATITUDE<sup>10</sup> trials demonstrated a survival advantage for the combined use of abiraterone with commencement of ADT however this was offset by earlier and more prolonged androgen suppression and a higher risk of grade 3 to 5 adverse events.

Hence, while new treatments for advanced PCa prolong life, this means men are living longer with the effects of both treatment and disease progression including deteriorating bone health, pain, hot flushes, loss of libido, erectile dysfunction, increased fat mass, sarcopenia, fatigue, and cognitive decline<sup>6,11</sup>. Men with advanced PCa have poorer quality of life, higher levels of psychological distress, increased suicide risk, and more unmet supportive care needs compared to men with localised disease<sup>12-15</sup>. Approximately 1 in 4 experience regret about treatment decisions and this is associated with poorer quality of life and increased distress<sup>16</sup>. In sum, the burden associated with advanced PCa is substantial and further evolving as new treatments emerge.

Problematically, to date there is scant psychosocial or supportive care intervention research directly targeting men with advanced PCa; and the one randomised trial of scale completed by our team failed to prove effectiveness<sup>17,18</sup>. Researchers in Canada and Scotland have previously highlighted the persisting support services gap for men with advanced PCa and suggested more qualitative research elucidating men's experiences is needed if we are to develop effective supportive care interventions<sup>19,20</sup>. Carter et al in 2011 explored the supportive care needs of men with advanced PCa and concluded that functional issues, information needs, and emotional distress were the three

## Supportive care needs of men with advanced prostate cancer

domains of need that needed to be addressed<sup>19</sup>. More recently, Paterson et al (2017) interviewed eight men with advanced PCa describing a broader range of challenges extending to interpersonal and intimacy needs<sup>20</sup>. Both studies emphasised the gap in informational support for these men, however neither deeply explored issues related to masculinities or the broader social and public health context in which this illness experience is nested<sup>21-23</sup>. We sought to extend this previous work more specifically connecting our enquiry between men's challenges and their preferences for support within their social context. Accordingly, we explored the lived experience of men with advanced PCa (proven metastatic or castration-resistant biochemical regression) and their supportive care preferences applying a phenomenological approach.

## Method

### Study design

This study applied a cross-sectional qualitative design. In a preparatory first step, participants first reflected on their experience with advanced PCa via a mail administered open-ended survey. Responses informed development of a protocol which guided subsequent semi-structured in-depth telephone interviews. Consistent with the study aim to better understand men's experiences and unearth gaps in understanding we adopted a phenomenological perspective<sup>24</sup>. Ethical approval was obtained from the Griffith University Human Research Ethics Committee (Reference number 2016/418).

### Participants and recruitment

Participants were recruited from an existing patient study cohort<sup>14</sup>. In June 2016 we contacted men who had not withdrawn from the cohort and were not to our knowledge deceased and had consented to be contacted about future research (N=141). In all, 39 men returned the survey (28% response) and of these 28 were available for telephone interview between September 2016 and November 2016 (72% response). Mean age of participants was 72.7 years (SD=8.5; range 58.2-94.6) and majority were born in Australia (75%), married (86%), and retired (79%). Mean time since diagnosis was 7.7 years (SD=5.0; range 2.1-22.8). Most men were treated with ADT (88%); 73% radiation therapy; 62% prostatectomy. Men who did not participate were either too unwell (n=4), had

1  
2  
3 a hearing impairment (n=1), or did not consent (n=6). Table 1 reports sociodemographic  
4 characteristics and treatment information for each interview participant.

### 6 7 **Data collection**

8  
9 Men responded to four questions in the open-ended survey about their PCa-related concerns  
10 or challenges; assistance or support accessed for these concerns and from whom; other support  
11 needed; and preferences for support for men. Thematic analysis<sup>25</sup> of survey responses (MH, KL, SC)  
12 indicated four areas that were challenging for men and in which they lacked support: information,  
13 medical care, side-effects, and the future. Three experienced female interviewers in a research fellow  
14 or research assistant position with post-graduate training in the behavioural sciences (ML, KL, EE)  
15 conducted telephone interviews to further explore the key areas identified. Interviews were on average  
16 62.1 minutes in length (SD=19.2; range=29.2 to 111.9 minutes). Member checking occurred at the  
17 beginning of each interview during which the interviewer asked participants to comment on the  
18 accuracy of researcher interpretation of survey results and gave participants the opportunity to add  
19 anything they thought had been missed. Interview questions (Table 2) explored in greater depth the  
20 concerns previously identified in men's survey responses: health system concerns, supportive care  
21 needs, barriers to support and preferred approaches. Participants were also invited to discuss other  
22 aspects of their experience that they considered were important. Interviews were audio-recorded and  
23 transcribed verbatim.  
24  
25  
26  
27  
28  
29  
30  
31  
32  
33  
34  
35  
36  
37

### 38 39 **Data analysis**

40 Interview transcripts were analysed using thematic analysis<sup>25</sup>. Themes were derived  
41 inductively from the data without guidance a priori from theory. Coders had behavioural science (SC,  
42 MH, JD, KL), psycho-oncology (SC, MH, JD, KL), and nursing (SC) backgrounds. Once all  
43 interviews had concluded, interview transcripts were coded iteratively with constant comparison  
44 between the codes generated and the data to ensure that consistent and diverging responses were  
45 incorporated. Two research team members independently coded one-third of the transcripts and  
46 generated a preliminary coding scheme (MH, KL). This coding scheme was further refined with a  
47 third (SC) and fourth (JD) research team member. Once all interview transcripts were included the  
48 coding scheme was further reviewed and agreed upon by all coders. Exemplar responses were  
49  
50  
51  
52  
53  
54  
55  
56  
57  
58  
59  
60

## Supportive care needs of men with advanced prostate cancer

1  
2  
3 identified across transcripts to illustrate and confirm labelling of themes. Reporting of data is  
4 consistent with consolidated criteria for reporting qualitative studies (COREQ) guidelines<sup>26</sup>.  
5  
6

## 7 **Results**

8  
9 Thematic analysis identified two organising themes: lived experience and supportive care.  
10 The first organising theme reflected men's lived experience with advanced PCa, and within this six  
11 super-ordinate themes. The second organising theme captured elements of supportive care that men  
12 found challenging and their preferences for how care should be delivered, and within this five super-  
13 ordinate themes. Figure 1 depicts the coding structure. Tables 3 and 4 present illustrative quotes for  
14 each super-ordinate theme.  
15  
16  
17  
18  
19

### 20 **Lived experience**

21  
22 Men's lived experience with advanced PCa included six super-ordinate themes: regret about  
23 late diagnosis and treatment decisions; being discounted in the health system; fear/uncertainty about  
24 the future; acceptance of their situation; masculinity; and treatment effects (Table 3).  
25  
26  
27

#### 28 ***Regret about late diagnosis and treatment decisions***

29  
30 Men described feeling regret about late diagnosis or treatment and this was commonly  
31 attributed to delays by clinicians. Men perceived these delays were caused by general practitioners  
32 and/or specialists who would not perform digital rectal examinations (DREs) or prostate-specific  
33 antigen (PSA) testing; did not detect PCa until it was well advanced despite regular testing; and did  
34 not refer patients for further treatment or testing in a timely manner despite men's requests for them to  
35 do so. From this, some men were left with a distrust of the medical profession. Men also discussed  
36 regretting their treatment choices and not having had a second opinion so that they felt more  
37 adequately informed and clearly understood the outcomes of treatment, including side effects, and  
38 how these could be managed.  
39  
40  
41  
42  
43  
44  
45  
46  
47

#### 48 ***Being discounted in the health system***

49  
50 In their interactions with clinicians, men described their concerns, needs and autonomy as  
51 discounted or ignored. Men felt devalued and believed they were somehow less important in the  
52 broader health system. In their experience, PCa was the 'poor cousin' of breast cancer in terms of  
53 funding, research focus, and controversy over the value of PSA testing; and less effort by the  
54  
55  
56  
57  
58  
59  
60



1  
2  
3 government and non-profits to promote awareness of PCa. Men also considered that they and their  
4 cancer were less important due to their older age and community attitudes where PCa is considered a  
5 cancer that may not lead to death.  
6  
7

### 8 ***Fear/uncertainty about the future***

9  
10 An uncertain future was discussed in terms of men needing to make 'the unknowable' a  
11 known entity by understanding how much time they may have left to live; what lies ahead for disease  
12 progression and quality of life; potential treatment options; and next steps for support when all  
13 treatment options had been exhausted. This information was critical to men's ability to feel more in  
14 control and to prepare for the future both psychologically and practically while they were well enough  
15 to do so. By contrast, some men discussed not wanting to know what the future held in order to focus  
16 on their day-to-day life.  
17  
18  
19  
20  
21  
22  
23

### 24 ***Acceptance***

25  
26 Men used their age as a frame to accept physical changes and the threat to their mortality.  
27  
28 Other approaches men adopted to reach acceptance were focusing on 'getting on with it', and viewing  
29 ongoing physical effects of the disease or its treatment as part of life, an inevitable outcome of  
30 treatment or disease progression, and as a favourable alternative to death. Regarding sexuality, some  
31 men found changes in their physical capacity to have sex an ongoing cause of distress. Other men  
32 shifted their focus to other aspects of their relationships (e.g., expressing intimacy in ways that do not  
33 require an erection) as a way to accept their situation.  
34  
35  
36  
37  
38  
39

### 40 ***Masculinities***

41  
42 Male values and masculinities were discussed as central to men's experience of PCa, support,  
43 and coping. Men believed that as a group they do not look after themselves, go to the doctor, ask for  
44 help, or talk about their problems by comparison to women, and have a different view on their health,  
45 are less prepared to discuss their health, and gave health less attention. This reluctance to seek help or  
46 support or talk about their problems was ascribed to male values around being strong, capable,  
47 independent/autonomous, or stoic. Some men used avoidance as a coping approach by avoiding  
48 thinking or talking about their situation, and covering up or ignoring side-effects or a need for  
49 support. Some men expressed concerns that there would be negative consequences socially or in their  
50  
51  
52  
53  
54  
55  
56  
57  
58  
59  
60

## Supportive care needs of men with advanced prostate cancer

1  
2  
3 employment if others knew about their cancer. Privacy and being embarrassed talking about personal  
4 issues were also raised. Viewing sexuality and sexual function as important to their identity as a man  
5 meant that some men were deeply troubled by changes in sexuality; and believed that their  
6 relationship with their partner now would be negatively impacted or that it would no longer be  
7 possible for them to start new relationships with women.  
8  
9  
10  
11

12 In their perceived role as ‘the provider’ and ‘the protector’, some men expected to give help  
13 rather than receive it. Men tried to protect their wives or their family by not talking about their  
14 problems and thus avoid worrying them. They also adopted approaches to promote adjustment  
15 including being optimistic and ‘getting on with it’; taking responsibility for their health and well-  
16 being (e.g., remaining physically active); as well as an action-oriented approaches in which they  
17 identified and solved problems directly or sought help or support. In using these approaches, men  
18 saw themselves not constrained by masculine norms constraining help seeking. Some men devalued  
19 ‘talk’ as a way to obtain support and viewed psychologists as not able to provide the solutions they  
20 needed, also describing unfavourable attitudes towards support groups as an opportunity for self-pity  
21 or drama.  
22  
23  
24  
25  
26  
27  
28  
29  
30  
31

***Treatment effects***

32  
33  
34 Men discussed the effects of advanced PCa and its treatment that affected their quality of life,  
35 relationships, capacity to do daily tasks, and for some men were highly distressing. Prominent  
36 amongst these were physical effects and financial concerns. Physical effects included the inability to  
37 obtain an erection; lack of libido; urinary incontinence; changes in appearance and bodily structure  
38 including gynecomastia; weight gain; sarcopenia; decreased bone density; fatigue; dizziness; loss of  
39 balance; breathlessness; hot flushes; cognitive changes; and pain. Some men discussed no longer  
40 being well enough to work and that this negatively affected their income and retirement plans.  
41  
42  
43  
44  
45  
46  
47

***Supportive care***

48  
49  
50 The organising theme supportive care included five super-ordinate themes: communication;  
51 care coordination; accessible care; shared experience/peer support; and involvement of their  
52 partner/family (Table 4).  
53  
54  
55

***Communication***

1  
2  
3 Men had mixed experiences in their interactions and communication with health  
4 professionals. Four pivotal points in the care trajectory in which effective communication appeared  
5 most critical were: diagnosis; deciding on treatment options; treatment effects and symptom  
6 management; follow-up care. Some men described being unclear about the specifics of their  
7 diagnosis (e.g., staging, PSA). Other men appreciated the direct and honest approach adopted by their  
8 clinicians when communicating about the severity of their disease. When discussing treatment  
9 options, men desired more guidance and support in making a treatment decision; and for options to be  
10 more clearly communicated so that they could better understand long-term treatment effects. Some  
11 men were dismayed that their GPs or other health professionals did not seem to have specialised  
12 knowledge about PCa. Preferred decision support included clear, unbiased communication about the  
13 pros and cons of each treatment option and referral to other sources of information that men could  
14 consider in their own time.

15  
16  
17  
18  
19  
20  
21  
22  
23  
24  
25  
26  
27 Some men described confusion and frustration when they were given a treatment that they  
28 needed to self-administer (e.g., injections) but were not effectively instructed in how to do this. Men  
29 commonly discussed health professionals' communication about treatment side-effects as insufficient  
30 (e.g., told about treatment effects but not how to deal with them) and selective (e.g., told about  
31 immediate but not long-term treatment effects), and as a consequence felt unprepared and isolated in  
32 their experience. Men also described that they did not feel listened to when they raised their concerns  
33 or able to get clear answers to questions. Some men expressed that it was up to them to find solutions  
34 to manage their side-effects because clinicians did not adequately address these.

### 35 36 37 38 39 40 41 42 ***Care Coordination.***

43  
44 For some men, regular ongoing communication with their clinicians was a source of support,  
45 however other men felt out of touch and isolated due to the length of time between each consultation.  
46 GPs were important to some men in helping them feel connected with their care team. Men discussed  
47 the need for better coordinated care and information and this was focused on three aspects:  
48 communication between health professionals; having a 'middle man'; and integrating psychosocial  
49 support as part of routine care.  
50  
51  
52  
53  
54  
55  
56  
57  
58  
59  
60

## Supportive care needs of men with advanced prostate cancer

1  
2  
3 A lack of communication between specialist clinicians regarding treatment and referral was  
4 discussed as problematic. Men had mixed views as to who should be the central point of call for  
5 information and referral. Some men believed this should be their GP; others suggested their urologist  
6 or oncologist should have this responsibility. Patient advocates or navigators were also discussed as  
7 an option to help streamline and clarify the diagnostic and treatment process. Most commonly men  
8 discussed PCa nurses as being central to their care. Nurses provided informational, emotional, and  
9 practical support that clarified men's understanding of their situation; served as an intermediary  
10 between the patient or couple and other clinicians; and men believed PCa nurses were more likely to  
11 refer them to other beneficial services than other health care professionals. Men discussed that the  
12 best time to be connected with a PCa nurse was at diagnosis with continued access throughout  
13 treatment.  
14  
15  
16  
17  
18  
19  
20  
21  
22  
23

24 Men identified the need to integrate psychosocial support as part of routine care without  
25 relying on men themselves to raise emotional issues with clinicians. Alongside this, men also  
26 discussed the need for routine referral to support groups or information about the existence of local  
27 groups. Men also discussed exercise programs as helpful for weight gain and muscle wastage as well  
28 as with reducing feelings of loss of masculinity.  
29  
30  
31  
32  
33

***Accessible care***

34  
35  
36 Men discussed three main barriers to accessible care: geographic location; ill health and  
37 financial cost of treatment. Solutions to overcoming accessibility issues were described. Men  
38 experienced difficulty accessing services because they resided in a regional or rural location where  
39 services were either not available or required them to travel long distances with resultant cost and  
40 inconvenience. Other men had difficulty or were prevented from accessing central or nearby services  
41 due to ill health or fatigue. Some men also discussed the high financial cost of treatment or drugs to  
42 manage side-effects such as erectile dysfunction and their uncertainty about how to cover these costs.  
43 To overcome accessibility issues, men suggested use of online or telephone services for those in rural  
44 or regional areas or who could not access care due to ill health; lobbying the government to subsidise  
45 financial costs of treatment; and increasing the availability of home-based medical care or practical  
46 assistance services where needed.  
47  
48  
49  
50  
51  
52  
53  
54  
55  
56  
57  
58  
59  
60

### ***Shared experience/peer support***

The opportunity to talk to other men in the same situation was commonly discussed by men as a source of support that they had or wished they had an awareness of and access to. Men described three aspects of shared experience/peer support: benefits; delivery preferences; and barriers. Shared experience was highly valued because it allowed men to talk to someone who had been through the same experience; obtain information or advice when weighing up treatment decisions or managing side effects; make positive upward (e.g., other men doing well and inspiring hope for recovery) or downward (e.g., other men are doing worse so I am ok) comparisons<sup>27</sup>; gave men a safe and confidential forum to express their concerns; and helped men to feel less alone. However, men did not always describe the concept of shared mutual experience as peer support or being connected to support groups. Mutual support also occurred through companionship with other men who did not have cancer such as at Men's Sheds and social or sporting clubs.

Men proposed different delivery methods for peer support (e.g., face-to-face, telephone, or online) to take into account individual differences and need for privacy or anonymity. Both structured (e.g., with a facilitator and an agenda) and unstructured (e.g., a chat over coffee) methods were acceptable. Some men preferred shared experiences specifically for men with advanced disease on the basis that men with localised disease have different treatments and cancer-related physical effects.

Finally, despite acknowledging the benefits of shared experience, men also discussed barriers to peer support use and availability. These included feeling uncomfortable to share in a group; the difficulty of sustaining support groups; death of peers; and the belief that support groups were focused only on emotional or psychological information.

### ***Involvement of partner/family***

In addition to shared experience, men identified partners and/or family and friends as sources of support that contributed to their emotional and physical wellbeing. For some men, female partners were their main source of emotional and practical support. Men discussed that partners were also impacted by the diagnosis and treatment of PCa and believed it was important to involve their partners in their care and available support. Men also commented that partners are often the catalyst for their involvement in support groups or seeking out information or support from other sources.

## Supportive care needs of men with advanced prostate cancer

1  
2  
3 Men's broader family, friends and neighbours were also discussed as sources of support, often  
4  
5 providing practical assistance.

**Discussion**

6  
7  
8 The present study extends previous research about the experience of men with advanced  
9  
10 prostate cancer, adding an additional level of description that provides insight into how health context  
11  
12 influences men's responses; the influence of life course; and ways in which masculinities is expressed  
13  
14 in this setting. As in previous research, difficulties with accessible informational support about the  
15  
16 disease and its treatment were highly evident<sup>19,20</sup>. That these problems persist and are remarkably  
17  
18 similar in Canada<sup>19</sup>, Scotland<sup>20</sup>, and in our Australian data, is striking and suggests that globally  
19  
20 there may be a gap in health systems' responses to advanced prostate cancer. Prostate cancer  
21  
22 survivorship research has to date been underfunded by comparison to breast cancer<sup>28</sup>; a consensus  
23  
24 about clinical care for advanced prostate cancer is just now emerging<sup>29</sup>; and the historical and  
25  
26 persistent debate about the early detection of prostate cancer<sup>23,30</sup> are likely contributors to this. The  
27  
28 men's reports in our study of prostate cancer having a less favourable public profile reflect this and  
29  
30 show how the broader public health and social context can have a profound negative impact on an  
31  
32 already difficult cancer experience.

33  
34 The influence of life course in response to illness in terms of men's age and the expression of  
35  
36 masculinities and masculine models of coping strongly emerged in this study and this has implications  
37  
38 for the design of care models<sup>31</sup>. We propose that there is a need to newly conceptualise and then  
39  
40 deliver what men actually want, rather than starting from a first principle of revising services already  
41  
42 provided that are not meeting men's needs. Men underutilise psychosocial support services after  
43  
44 cancer compared to women with breast cancer<sup>32</sup>; and previous research has suggested that  
45  
46 interventions promoting self-management in men with cancer and other chronic diseases should  
47  
48 include action oriented approaches if they are to be utilised<sup>33,34</sup>. With regards to providers of support,  
49  
50 men in the present study proposed both peer support and nurse specialists as preferred care providers,  
51  
52 confirming previous research<sup>35</sup>.

53  
54 Limitations of the present study include the cross sectional design. Recent qualitative  
55  
56 research applying a prospective study design proposed that coping with advanced cancer evolves over  
57  
58

## Supportive care needs of men with advanced prostate cancer

1  
2  
3 time as symptoms progress and fluctuate<sup>36</sup>. Future research utilising a prospective case study design  
4  
5 will add further depth to our understanding of men's experiences in the face of advancing prostate  
6  
7 cancer. As well, the men in our study were not newly diagnosed with advanced disease and so reports  
8  
9 of their experience at the time of diagnosis or initial disease progression are retrospective and subject  
10  
11 to recall bias. Strengths include a robust and transparent study method and the application of a  
12  
13 phenomenological theoretical approach such that our data can be considered valid, reliable, and  
14  
15 transferable within the Australian setting. However, a high level of concurrence with previous  
16  
17 research supports a wider application of our results to other similar health care settings.

18  
19 Based on our previous research<sup>17,37</sup> and the present results we propose five key content  
20  
21 elements for inclusion in supportive care interventions with men with advanced prostate cancer:  
22  
23 decision support; treatment education with self-management and skills training for symptom effects,  
24  
25 including exercise prescription; routine screening for psychological distress with referral; psycho-  
26  
27 education with tailored distress management strategies; communicating with health professionals.  
28  
29 Strategies to integrate peer support within the care team are needed. Finally, the prostate cancer  
30  
31 specialist role presents as highly acceptable to men and should be central in supportive care delivery  
32  
33 and care coordination.

34  
35 In conclusion, supportive care services for men with advanced prostate cancer need to be  
36  
37 multimodal and take into account the influence of life course on men's illness experience. More  
38  
39 broadly there is a need for the health system to prioritise research and development in clinical prostate  
40  
41 cancer care taking a more holistic approach than currently exists.

**Author contributions**

42  
43  
44  
45 SC, JD and MH conceived the study, developed the interview protocol, undertook the analyses and  
46  
47 interpretation, and led manuscript development. KL recruited and interviewed participants, undertook  
48  
49 analysis and contributed to writing the manuscript. ML recruited and interviewed participants. MF, ID  
50  
51 and AL contributed to data interpretation. All authors contributed to revisions and approved the final  
52  
53 manuscript.



## References

1. Ferlay J, Soerjomataram I, Ervik M, et al. GLOBOCAN 2012 v1. 0, Cancer Incidence and Mortality Worldwide: IARC CancerBase No. 11. Lyon, France: International Agency for Research on Cancer; 2013 [Available from: [globocan.iarc.fr/Default.aspx](http://globocan.iarc.fr/Default.aspx) accessed 8th April 2017].
2. Australian Institute of Health and Welfare. Cancer in Australia 2017. Cancer series no. 101. Cat. No. CAN 100. Canberra, Australia: AIHW 2017.
3. National Cancer Institute. SEER Cancer Stat Facts: Prostate Cancer Bethesda, MD: National Cancer Institute; 2016 [Available from: <http://seer.cancer.gov/statfacts/html/prost.html> accessed 8th April 2017].
4. Luo Q, Yu XQ, Smith DP, et al. A population-based study of progression to metastatic prostate cancer in Australia. *Cancer Epidemiology* 2015;39(4):617-22. doi: 10.1016/j.canep.2015.04.013
5. American Cancer Society. Cancer Facts & Figures 2017. Atlanta,GA: American Cancer Society, 2017.
6. Crawford ED, Petrylak D, Sartor O. Navigating the evolving therapeutic landscape in advanced prostate cancer. *Urologic Oncology: Seminars and Original Investigations* 2017;35:S1-S13. doi: 10.1016/j.urolonc.2017.01.020
7. Heidenreich A, Bastian PJ, Bellmunt J, et al. Guidelines on prostate cancer. 2012: European Association of Urology., 2012.
8. Afshar M, Evison F, James ND, et al. Shifting paradigms in the estimation of survival for castration-resistant prostate cancer: A tertiary academic center experience. *Urologic Oncology: Seminars and Original Investigations* 2015;33(8):338-e1. doi: 10.1016/j.urolonc.2015.05.003
9. James ND, de Bono JS, Spears MR, et al. Abiraterone for prostate cancer not previously treated with hormone therapy. *New England Journal of Medicine* 2017;377:338-51. doi: 10.1056/NEJMoa1702900
10. Fizazi K, Tran N, Fein L, et al. Abiraterone plus prednisone in metastatic, castration-sensitive prostate cancer. *New England Journal of Medicine* 2017;377:352-60. doi: 10.1056/NEJMoa1704174
11. Gilbert DC, Duong T, Kynaston HG, et al. Quality - of - life outcomes from the Prostate Adenocarcinoma: TransCutaneous Hormones (PATCH) trial evaluating luteinising hormone - releasing hormone agonists versus transdermal oestradiol for androgen suppression in advanced prostate cancer. *BJU International* 2017;119(5):667-75. doi: 10.1111/bju.13687
12. Bill-Axelsson A, Garmo H, Lambe M, et al. Suicide risk in men with prostate-specific antigen-detected early prostate cancer: a nationwide population-based cohort study from PCBaSe Sweden. *European Urology* 2010;57(3):390-95.
13. Bloch S, Love A, Macvean M, et al. Psychological adjustment of men with prostate cancer: a review of the literature. *BioPsychoSocial Medicine* 2007;1(1):2.
14. Chambers SK, Occhipinti S, Foley E, et al. Mindfulness-based cognitive therapy in advanced prostate cancer: a randomized controlled trial. *Journal of Clinical Oncology* 2016;35(3):291-97. doi: 10.1200/JCO.2016.68.8788
15. Eton DT, Lepore SJ. Prostate cancer and health - related quality of life: a review of the literature. *Psycho - Oncology* 2002;11(4):307-26.
16. Clark JA, Wray NP, Ashton CM. Living with treatment decisions: regrets and quality of life among men treated for metastatic prostate cancer. *Journal of Clinical Oncology* 2001;19(1):72-80.
17. Chambers S, Hyde M, Smith D, et al. A Systematic Review of Psychological Interventions for Prostate Cancer Survivors and Their Partners: Clinical and Research Implications. *Psycho-Onc* 2017;26(7):873-913. doi: 10.1002/pon.4431



18. Chambers SK, Occhipinti S, Foley E, et al. Mindfulness-Based Cognitive Therapy in Advanced Prostate Cancer: A Randomized Controlled Trial. *J Clin Onc* 2017;35(3):291-97. doi: doi:10.1200/JCO.2016.68.8788
19. Carter N, Bryant-Lukosius D, DiCenso A, et al. The supportive care needs of men with advanced prostate cancer. *Oncol Nurs Forum* 2011;38(2):189-98. doi: 10.1188/11.ONF.189-198
20. Paterson C, Kata RSG. Unmet Supportive Care Needs of Men With Locally Advanced and Metastatic Prostate Cancer on Hormonal Treatment. 2017 doi: 10.1097/NCC.0000000000000482.
21. Chambers S, Hyde M, Zajdlewicz L, et al. Measuring Masculinity in the Context of Chronic Disease. *Psychology of Men & Masculinity* 2015;17(3):228-42. doi: 10.1037/men0000018
22. Chambers SK, Chung E, Wittert G, et al. Erectile dysfunction, masculinity, and psychosocial outcomes: a review of the experiences of men after prostate cancer treatment. *Translational Andrology and Urology* 2017;6(1):60-68. doi: 10.21037/tau.2016.08.12
23. Dunn J, Casey C, Sandoe D, et al. Advocacy, support and survivorship in prostate cancer. *Eur J Cancer Care* 2017:e12644-n/a. doi: 10.1111/ecc.12644
24. Patton MQ. Qualitative research & evaluation methods. 3rd ed. Thousand Oaks, California: Sage Publications 2002.
25. Braun V, Clarke V. Using thematic analysis in psychology. *Qualitative research in psychology* 2006;3(2):77-101. doi: 10.1191/1478088706qp063oa
26. Tong A, Sainsbury P, Craig J. Consolidated criteria for reporting qualitative research (COREQ): a 32-item checklist for interviews and focus groups. *International Journal for Quality in Health Care* 2007;19(6):349-57.
27. Wood JV. Theory and research concerning social comparisons of personal attributes. *Psychological Bulletin* 1989;106(2):231-48. doi: 10.1037/0033-2909.106.2.231
28. AIHW. Cancer in Australia 2010: an overview. In: Australian Institute of Health and Welfare, ed. Canberra: Australian Institute of Health and Welfare, 2010.
29. Gillessen S, Attard G, Beer TM, et al. Management of Patients with Advanced Prostate Cancer: The Report of the Advanced Prostate Cancer Consensus Conference APCCC 2017. *European Urology* 2017 doi: 10.1016/j.eururo.2017.06.002
30. Lepor H. Opinion Makers: Revisiting the USPSTF Decision on PSA Tests - Urologist Herbert Lepor, MD, sets forth 'sensible solution' *Medpage Today* 2016.
31. Evans J, Frank B, Oliffe JL, et al. Health, Illness, Men and Masculinities (HIMM): a theoretical framework for understanding men and their health. *Journal of Men's Health* 2011;8(1):7-15. doi: 10.1016/j.jomh.2010.09.227
32. Forsythe LP, Kent EE, Weaver KE, et al. Receipt of psychosocial care among cancer survivors in the United States. *J Clin Onc* 2013;31(16):1961-9. doi: 10.1200/jco.2012.46.2101
33. Galdas PM, Cheater F, Marshall P. Men and health help-seeking behaviour: literature review. *J Adv Nurs* 2005;49(6):616-23. doi: 10.1111/j.1365-2648.2004.03331.x [published Online First: 2005/03/02]
34. Roesch SC, Adams L, Hines A, et al. Coping with prostate cancer: a meta-analytic review. *Journal of Behavioral Medicine* 2005;28(3):281-93.
35. King AJL, Evans M, Moore THM, et al. Prostate cancer and supportive care: a systematic review and qualitative synthesis of men's experiences and unmet needs. *Eur J Cancer Care* 2015;24(5):618-34. doi: 10.1111/ecc.12286
36. Roberts D, Calman L, Large P, et al. A revised model for coping with advanced cancer. Mapping concepts from a longitudinal qualitative study of patients and carers coping with advanced cancer onto Folkman and Greer's theoretical model of appraisal and coping. *Psycho-Onc*:n/a-n/a. doi: 10.1002/pon.4497
37. Zopf EM, Newton RU, Taaffe DR, et al. Associations between aerobic exercise levels and physical and mental health outcomes in men with bone metastatic prostate cancer: a cross-sectional investigation. *Eur J Cancer Care* 2016:n/a-n/a. doi: 10.1111/ecc.12575

## Supportive care needs of men with advanced prostate cancer

**Table 1**

Sociodemographic characteristics and treatment information for participants completing an open-ended survey and telephone interview

N = No; NR = Not reported; W = Widowed (married at time of diagnosis); Y = Yes.

TABLE REMOVED TO PROTECT PARTICIPANTS IDENTITY.

For peer review only

**Table 2**

Interview questions

| Focus area            | Question                                                                                                                                                                                                                                                       |
|-----------------------|----------------------------------------------------------------------------------------------------------------------------------------------------------------------------------------------------------------------------------------------------------------|
| Health system         | Thinking about your medical treatment, what changes do you feel would make medical services better meet the needs of men with advanced prostate cancer?                                                                                                        |
| Supportive Care Needs | Thinking about the treatment side effects that a man with advanced prostate cancer might experience, what sort of support would help most?                                                                                                                     |
|                       | Thinking about the future and the worries that face a man with prostate cancer that has advanced or recurred, what sort of support would help most?                                                                                                            |
| Barriers              | In developing services to help men cope or manage better with advanced prostate cancer, can you describe support approaches or ways of helping that would <b>not</b> be acceptable to men? For example, supportive approaches that would turn men off or away? |
| Preferred approaches  | In developing services to help men cope or manage better with advanced prostate cancer, can you describe support approaches or ways of helping that would be more attractive to men?                                                                           |
| Other                 | Thinking about what we have spoken about today, is there anything else we haven't covered that you think is important to supporting men with advanced prostate cancer?                                                                                         |

For peer review only

## Supportive care needs of men with advanced prostate cancer

**Table 3**

Lived experience organising theme and super-ordinate themes

| Super-ordinate theme                                | Exemplar quotes                                                                                                                                                                                                                                                                                                                                                                                                                                                                                                                                                                                                                                                                                                                                                                                                                                                                                                                                                    |
|-----------------------------------------------------|--------------------------------------------------------------------------------------------------------------------------------------------------------------------------------------------------------------------------------------------------------------------------------------------------------------------------------------------------------------------------------------------------------------------------------------------------------------------------------------------------------------------------------------------------------------------------------------------------------------------------------------------------------------------------------------------------------------------------------------------------------------------------------------------------------------------------------------------------------------------------------------------------------------------------------------------------------------------|
| Regret about late diagnosis and treatment decisions | “I saw a GP and first of all, I think it was 1.9 was my PSA reading, and when it got to 14 I said to him – everything I read tells me that I should be seeing a specialist. And he said, “Oh you worrywart, don’t worry about it,” and then next time I said it, he said, “All right I’ll send you to see [...] he’s a urologist.” I went to see his specialist mate, and he said, “Bloody hell, where’ve you been, you should’ve been here three years ago.” Because it’d been like that for three or four years. The prostate was full of cancer, and it escaped outside the prostate and went into my lymph nodes, because of all that time wasted.” (P31)                                                                                                                                                                                                                                                                                                      |
| Being discounted in the health system               | “The men seemed to think that prostate cancer was a B grade compared to other cancers. Because it was older men, and they’d had their run probably. No-one’s going to worry too much about it...Usually men who have got prostate cancer are old, older men and certainly you wouldn’t all the funding going to the old men and not the young women, or middle-aged women. It wouldn’t be fair would it. So we thought that the prostate cancer people were sort of the poor relations in both attitude, funding, in a lot of ways. But you can’t change it.” (P26)                                                                                                                                                                                                                                                                                                                                                                                                |
| Fear/uncertainty about the future                   | “I’d just like to know where I’m headed. I guess he can’t tell me what’s going to happen with the disease, but I’d imagine there must be a pattern, a reasonable pattern of what happens. I mean, with some illnesses you know this is going to progress from this to that, to that, but an article I saw recently in a support group pamphlet was, if you took Drug X tablets, when they stopped working, you took Drug Y tablets. When they stopped working, the next thing on the - on the ladder was death, d-e-a-t-h. Well, I’ve been taking Drug X for quite a while. I’ve been taking Drug Y for quite a while. Each had a definite effect on my PSA, each lost that effect. So really, the next thing that faces me is death. Now, so, it was four months ago that my oncologist gave me, he said, “You’ll see your birthday.” Well, that’s only three months away, it’s only two months away actually. What’s going to happen between now and then?” (P6) |

## Supportive care needs of men with advanced prostate cancer

|                   |                                                                                                                                                                                                                                                                                                                                                                                                                                                                                                                                                                                                                                                                                                                                                                                                                                                                                                                                                                                                                                                                                                                                                                                                                                                                                                                                                                                                                                                                                                                                                                                                                                                                                                                                                                                                                                                                                                                                                                                                                                                                 |
|-------------------|-----------------------------------------------------------------------------------------------------------------------------------------------------------------------------------------------------------------------------------------------------------------------------------------------------------------------------------------------------------------------------------------------------------------------------------------------------------------------------------------------------------------------------------------------------------------------------------------------------------------------------------------------------------------------------------------------------------------------------------------------------------------------------------------------------------------------------------------------------------------------------------------------------------------------------------------------------------------------------------------------------------------------------------------------------------------------------------------------------------------------------------------------------------------------------------------------------------------------------------------------------------------------------------------------------------------------------------------------------------------------------------------------------------------------------------------------------------------------------------------------------------------------------------------------------------------------------------------------------------------------------------------------------------------------------------------------------------------------------------------------------------------------------------------------------------------------------------------------------------------------------------------------------------------------------------------------------------------------------------------------------------------------------------------------------------------|
| Acceptance        | <p>“I think acceptance. That would be the word that comes to mind. Not resignation, big difference in my mind between resignation and acceptance, but okay, I accept it, to live a bit longer, or feel a bit better. This is what happens, I've just got to come to terms with it the best way I can. I didn't handle it too well. I think even at that age, you think you're indestructible. Gees, it did happen. But, it's not the end of the world and that's the attitudinal part, I think, more so than – attitude in retrospect, acceptance and spirituality part of it...I can possibly liken it, sort of, something akin to grief counselling is what I needed. You know, there's anger, there's frustration, everything. The whole gambit. It's all there. It's like, okay, it's passed away now, you know, let it rest...I just assumed, pop a couple of Viagra, you'll be right. But, no. So, yeah, it's – yeah and that's a problem after being very active for such a long time with a beautiful wife, it's really hard, really hard to take.” (P30)</p>                                                                                                                                                                                                                                                                                                                                                                                                                                                                                                                                                                                                                                                                                                                                                                                                                                                                                                                                                                                           |
| Masculinity       | <p>“Partly, I think, the reluctance of men to talk about their health, or to talk about personal issues that the idea of maleness, being able to be stoic and cope, type of thing. And just in the idea of maleness, that, sort of, men don't cry, men are stoic, or you get on and cope with things, a lot of men have not been exposed to talking about personal matters and so find it difficult to do that.” (P9)</p>                                                                                                                                                                                                                                                                                                                                                                                                                                                                                                                                                                                                                                                                                                                                                                                                                                                                                                                                                                                                                                                                                                                                                                                                                                                                                                                                                                                                                                                                                                                                                                                                                                       |
| Treatment effects | <p>“I'm impotent, and that – put it this way, that's – honestly, that's something that I have an extremely hard time coming to terms with. My wife and I had a fantastic sex life but that's gone and there's now – yeah, it's probably as much my fault as hers but there's just nothing left of our marriage; we live together but that's about it.” (P38)</p> <p>“I can't even walk down the beach, put out – not having to urinate a couple of times, I take my dog for a pretty long walk each day and I'm looking over my shoulder and I'm always thinking one day I'm going to get busted and someone's going to call me a dirty old man and are they going to even be prepared to listen to the fact that I've had prostate cancer and it's not my fault?” (P14)</p> <p>“Eating is a problem, I have a problem eating. I don't really want to eat but I more or less force myself to eat, because I have no energy, but I've lost, I think, it's 40 kilos all together, but that's over a period. When I look in the mirror I see this gaunt face looking at – I thought I was fairly good looking for an old bloke but now I really look bloody painful, I take notice, like, god I'm gaunt. And I really am thin.” (P19)</p> <p>“The general fatigue, loss of energy, loss of muscle tone, the hormonal issues were probably the biggest ones. I've got osteoporosis because – it's only at the early stage, but my bone density is checked regularly, but it's dropping slowly even though I do exercise, walk a lot and keep my weight down and exercises up. I do that sort of thing all the time. But I'm probably holding it in check. But that one's always a bit of a concern. I've got to be careful I don't fall off the roof, I don't do something, don't break anything nowadays. In fact I – when I finished radiation therapy I felt all pretty smart and I went running on the rocks at the beach one day, and jumped from one rock to another, and snapped my ankle so badly it had to be screwed up with screws and braces.” (P5)</p> |

## Supportive care needs of men with advanced prostate cancer

---

“I now have gynecomastia which I’ve discussed with my GP and my specialist. I was looking at having my breasts removed, unfortunately which I would’ve had to pay for, but I was told that if I did, they would come back so it would be a waste of time and effort and money doing it.” (P38)

“I know the cancer’s spreading. I woke up this morning about 4 o’clock with pains in my pelvic, where it is, the pelvic bone where I suspect the cancer’s moving to. They said it would at the Cancer Clinic, so that gave me a bit of pain. But I find if I take Panadol, one of these Panadols – I take two at night and two in the morning and two midday, I keep the pain at a level that’s quite acceptable. But I didn’t take it last night and then I woke up at 4 o’clock and thought, oh, what’s going on here.” (P23)

“I mean one of the biggest impacts is financial loss and that is not discussed full stop. That’s when you’re diagnosed with a terminal illness and there is no cure. They can slow the disease down, which they’ve successfully done in my case. But because of the side effect of loss of testosterone, so you’ve got less energy, muscle wastage and all of that. And the end resulted in me – I had to give up work. Now, that financial loss has been – made a big impact on my retirement and everything else.” (P3)

---

**Table 4**

Supportive care organising theme and super-ordinate themes

| <b>Super-ordinate theme</b> | <b>Exemplar quotes</b>                                                                                                                                                                                                                                                                                                                                                                                                                                                                                                                                                                                                                                                                                                                                                                                                                                                                                                                                                                                                                                                                                                                                                                                                                                                                                                                                                                                                                                 |
|-----------------------------|--------------------------------------------------------------------------------------------------------------------------------------------------------------------------------------------------------------------------------------------------------------------------------------------------------------------------------------------------------------------------------------------------------------------------------------------------------------------------------------------------------------------------------------------------------------------------------------------------------------------------------------------------------------------------------------------------------------------------------------------------------------------------------------------------------------------------------------------------------------------------------------------------------------------------------------------------------------------------------------------------------------------------------------------------------------------------------------------------------------------------------------------------------------------------------------------------------------------------------------------------------------------------------------------------------------------------------------------------------------------------------------------------------------------------------------------------------|
| Communication               | <p data-bbox="661 397 1919 527">“For me at my stage, or more advanced, or – I don’t know at what stage I’m at. Whether I’m advanced or reasonable, or what. I don’t have any – I don’t have any real – I don’t know what the symptoms are – if you do get advanced or more advanced, I don’t know what the symptoms are really. I have no information in that regard. I don’t know.” (P17)</p> <p data-bbox="661 560 1919 657">“He’s not exactly verbose, he doesn’t say a great deal. And I got put on Drug Z and was more or less left to my own devices with my GP who I don’t think he’d ever heard of it and it wasn’t really until about three or four months ago that we managed to sort out how the injections should be given.” (P10)</p> <p data-bbox="661 690 1919 868">“Openness, I think, for me for the treatment options. Probably the side effects were less discussed or less publicised. There was some, particularly in the radiation process, you could get burning, you could get itching, this, or that, but then later on you find out there was some others that they didn’t mention...On that score, I think there’s some minor explanation, you will get tireder, you will get hot flushes, but no advice - what can you do about a hot flush; go and have a cold shower. There’s been nothing on that, and in terms of maybe a medication, is there something will help as it does for ladies, I’ve got no idea.” (P35)</p> |
| Care Coordination           | <p data-bbox="661 901 1919 1096">“You just get the impression going through the process that the different stages of the process all have their own people, their own separate team altogether. I guess, I could sum it up in a word and that’s coordination with all the different treatments and tests and results and everything to do with the treatment, all those things are there obviously, patients are being treated for a long, long time, but having been through the process I just find that even though you end up getting through it it’s a bit of a minefield for the patient because they haven’t got a clue really what’s involved, what’s coming next, what you’ve got to do.” (P20)</p> <p data-bbox="661 1128 1919 1226">“It’s got to be the doctors. The doctors, I think, it has to start at the GP level and go right through. This is, as I say, this is your life and they’re doing the journey with you. That’s a good way of putting it, they’re doing the journey with you.” (P15)</p> <p data-bbox="661 1258 1919 1347">“I’d say ideally at time of diagnosis, after you talk to the doctor the next step would be the prostate cancer nurse. Yeah. Into the treatment part of it, yes, as part of the treatment process. But, in some ways, I think, that if you’ve got, say, sort of a trusted person, so if it’s a prostate cancer nurse providing good information and directing</p>                                |

## Supportive care needs of men with advanced prostate cancer

1  
2  
3  
4  
5 traffic, type of thing, and putting people in touch with resources, I think, that's probably going to help to  
6 overcome the difficulties." (P9)  
7

8 "I think this support idea needs to be built in at diagnosis level into the, well, the doctors would present this as,  
9 "This is a natural part of the treatment, we're not saying go there if we think you need it, you have been  
10 diagnosed with cancer, you need it, we would strongly recommend you take your – take the benefit of going to a  
11 group for," I don't know how many meetings, but a few. And I also think that - how you do it I don't know, but  
12 that it gets presented – it is presented to men as, "This is what you do, there is no loss of dignity in going and  
13 talking over your problems with people who are in the state – in the same position as you are." (P39)

## Accessible care

14 "Well I'm up in the country and when I got diagnosed there was really no services in my town and it was a, you  
15 know an hour and a half trip to the closest place where could get anything done... Well they certainly – they  
16 didn't even have chemotherapy services here. And they didn't have helpers such as prostate nurses etcetera,  
17 people that were specifically trained in this sort of cancer. My oncologist, my urologists are all down in  
18 Melbourne. I mean they're two hours away in a motor car." (P34)  
19

20 "It's about \$40,000 a year. I think it's about four to 12, about \$4,000 a month I think. Which the majority of  
21 people can't afford anyway. So he's got a number of other drugs, too. But that's the one he'd like to use next  
22 for me. So we've got to deal with that when we get there." (P5)  
23

24 "I definitely would [go to another support group]. The problem is I can't drive anywhere at the moment because  
25 of some of the drugs I'm on; so it makes it very difficult for me to get anywhere. And now the closest group  
26 other than this one, even that one I had to go by car, but the next area's group is probably about twice the  
27 distance away and nowhere near public transport." (P27)  
28

## Shared experience/peer support

29 "And I think that's – the big help that people need, and they are finding it here because they come to support  
30 group, it's looking for some comfort, I think, or some advice, or to talk to someone who's been there and done  
31 that. I think that a lot of trouble with the GPs and the surgeons, they – a lot of them don't have that first-hand  
32 experience, even though they work with it every day of their lives they don't – they haven't had the actual  
33 experience of living with the disease first-hand anyway." (P5)  
34

35 "I think if you had someone or a little group of people who could meet and talk and have – maybe even in a  
36 coffee shop, have a cup of coffee, even the pub, have a beer or coffee or something and discuss your problems  
37 because that's where you'll find out that most of the people have problems the same as you. You get some men  
38 together, you can have someone facilitate it at first, then you just leave them and come back later on." (P19)  
39



## Supportive care needs of men with advanced prostate cancer

1  
2  
3  
4  
5  
6  
7  
8  
9  
10  
11  
12  
13  
14  
15  
16  
17  
18  
19  
20  
21  
22  
23  
24  
25  
26  
27  
28  
29  
30  
31  
32  
33  
34  
35  
36  
37  
38  
39  
40  
41  
42  
43  
44  
45  
46  
47

---

“Yeah, well face-to-face is the best way, but yeah, online, why not? Particularly with people in the country, assuming they know how to go online and handle IT and all that sort of thing. Yeah, somebody or some group of people that they can contact who do have the experience and have the understanding.” (P21)

“From a personal standpoint of view, the normal sort of prostate cancer support group hasn’t been of any real benefit to myself or my wife. And the reason advanced prostate cancer for now, based in south east Queensland, which covers all of Australia and we have a monthly telephone conference and that is, yeah that’s quite beneficial. Because everybody in it has got advanced prostate cancer. It’s just that yeah, I’ve got advanced metastatic prostate cancer and that’s what this group is particular for, for men with advanced. Because we joke and say we among ourselves, “Dead Men Walking Club.” Warped sense of humour...” (P3)

“And, I know, I found going to the support group, I walked into the room, I sat by myself and I didn’t sort of mix with the other men, but that unfortunately is me. I’m not a mixer, I’m not a conversationalist, although I seem to be talking pretty well to you. So I found them, it felt a bit uncomfortable. For those who have been there a long time, they were starting to hear the same thing over and over again. So I guess that might have been why I terminated going, one of the reasons. Very well run group, I just lost, I felt I was getting no benefit out of it and I wasn’t really comfortable there. That’s me, my particular makeup you can understand.” (P6)

---

Involvement of partner/family

“She (wife) senses my feelings, my moods, and she can tell if I’m feeling a bit negative by my comments or my talk, or mostly my body language. And she doesn’t beat around the bush, she just tells me to snap out of it, or, “Pull yourself together,” or “get yourself sorted”. Why don’t you do this, or why don’t you do that?” She doesn’t muck around, she really socks it to me, which is really good, it’s what I need. And I know that a lot of men say the same thing, they are always grateful for their partners in many, many cases, and we really live a lot longer with good wives, I can assure you. My wife is definitely the pinnacle. She’s the main support there.” (P5)

“So, I get help with transport and I have someone come and help me clean once a fortnight and that, but I probably need help with shopping, but I have friends who will go and do the shopping or take me shopping. So, I’m fairly well off in that regard. ...So, yeah, it’s good to have someone who will help you, you don’t want them mothering you, but take you and if I needed shopping we would go shopping after we’d been to the gym, heavy shopping, I need it, and bring it home.” (P19)

---

Supportive care needs of men with advanced prostate cancer

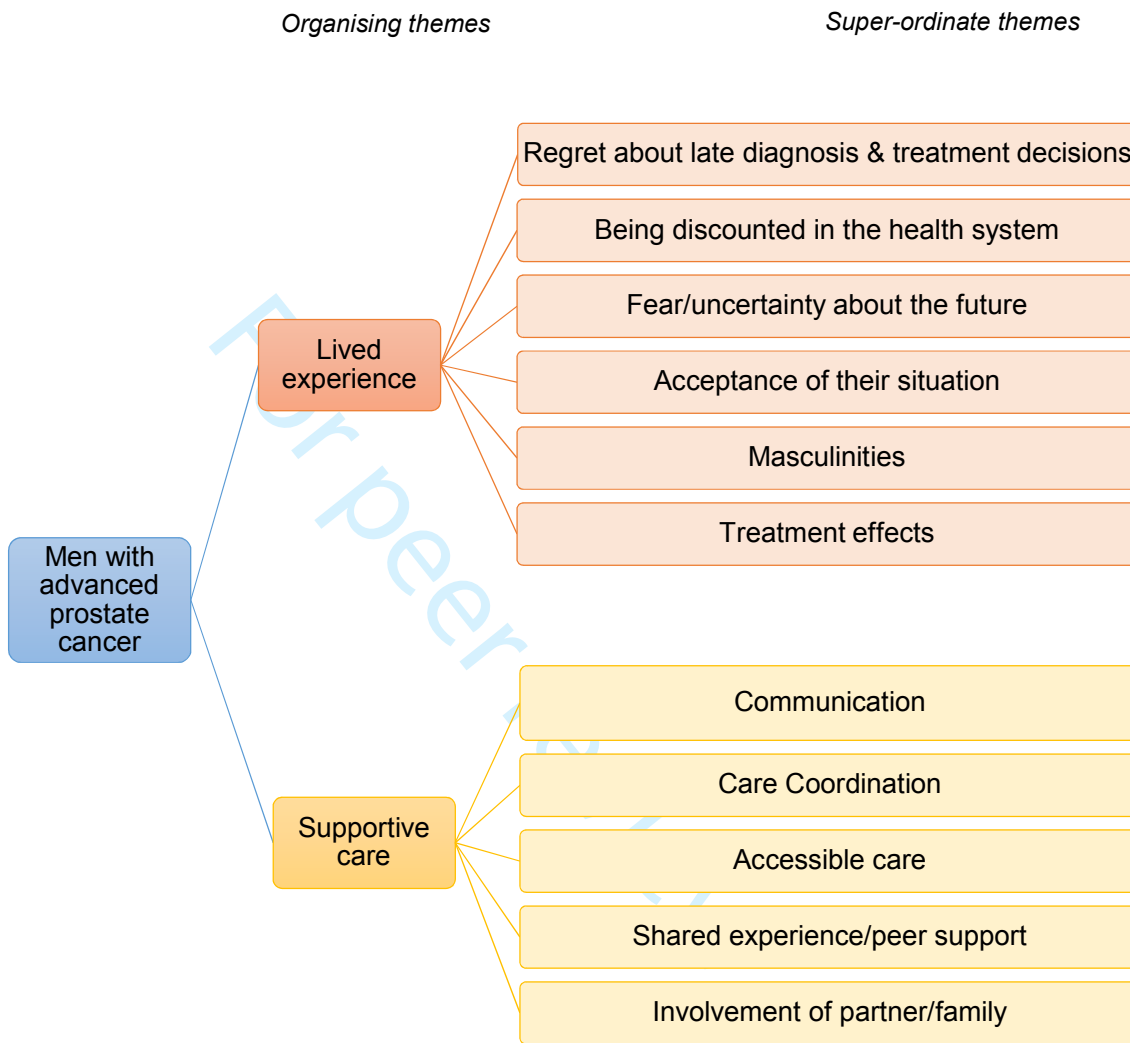

Figure 1. Coding structure derived from thematic analysis

# BMJ Open

## The experiences of men diagnosed with advanced prostate cancer: a qualitative study

|                                 |                                                                                                                                                                                                                                                                                                                                                                                                                                                                                                                                                                                                               |
|---------------------------------|---------------------------------------------------------------------------------------------------------------------------------------------------------------------------------------------------------------------------------------------------------------------------------------------------------------------------------------------------------------------------------------------------------------------------------------------------------------------------------------------------------------------------------------------------------------------------------------------------------------|
| Journal:                        | <i>BMJ Open</i>                                                                                                                                                                                                                                                                                                                                                                                                                                                                                                                                                                                               |
| Manuscript ID                   | bmjopen-2017-019917.R1                                                                                                                                                                                                                                                                                                                                                                                                                                                                                                                                                                                        |
| Article Type:                   | Research                                                                                                                                                                                                                                                                                                                                                                                                                                                                                                                                                                                                      |
| Date Submitted by the Author:   | 09-Nov-2017                                                                                                                                                                                                                                                                                                                                                                                                                                                                                                                                                                                                   |
| Complete List of Authors:       | Chambers, Suzanne; Griffiths University, Menzies Health Institute Queensland<br>Hyde, Melissa; Griffith University Menzies Health Institute Queensland; Cancer Council Queensland<br>Laurie, Kirstyn; Cancer Council Queensland; Griffith University Menzies Health Institute Queensland<br>Legg, Melissa; Griffith University Menzies Health Institute Queensland; Cancer Council Queensland<br>Frydenberg, Mark; Monash Health,<br>Davis, Ian; Monash University Eastern Health Clinical School<br>Lowe, Anthony; Prostate Cancer Foundation of Australia<br>Dunn, Jeff; University of Southern Queensland, |
| <b>Primary Subject Heading</b>: | Oncology                                                                                                                                                                                                                                                                                                                                                                                                                                                                                                                                                                                                      |
| Secondary Subject Heading:      | Sociology                                                                                                                                                                                                                                                                                                                                                                                                                                                                                                                                                                                                     |
| Keywords:                       | Prostate cancer, advanced cancer, metastatic, masculinities, supportive care needs, life course                                                                                                                                                                                                                                                                                                                                                                                                                                                                                                               |
|                                 |                                                                                                                                                                                                                                                                                                                                                                                                                                                                                                                                                                                                               |

SCHOLARONE™  
Manuscripts

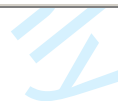

## The experiences of men diagnosed with advanced prostate cancer: a qualitative study

Suzanne K. Chambers<sup>1,2,3,4,5,6</sup>, Melissa K. Hyde<sup>1,2</sup>, Kirstyn Laurie,<sup>1,2</sup> Melissa Legg<sup>1,2</sup>, Mark Frydenberg<sup>3,7,8</sup>, Ian D. Davis<sup>3,9,10</sup>, Anthony Lowe,<sup>1,3,4</sup> and Jeff Dunn<sup>1,2,3,5</sup>.

<sup>1</sup> Menzies Health Institute Queensland, Griffith University, Southport, QLD, Australia

<sup>2</sup> Cancer Research Centre, Cancer Council Queensland, Brisbane, QLD, Australia

<sup>3</sup> Australian and New Zealand Urogenital and Prostate (ANZUP) Cancer Trials Group, Sydney, NSW, Australia

<sup>4</sup> Prostate Cancer Foundation of Australia, Sydney, NSW, Australia

<sup>5</sup> Institute for Resilient Regions, University of Southern Queensland, Toowoomba, QLD, Australia

<sup>6</sup> Health & Wellness Institute, Edith Cowan University, Perth, WA, Australia

<sup>7</sup> Department of Urology, Monash Health, Melbourne, VIC, Australia

<sup>8</sup> Department of Surgery, Faculty of Medicine, Monash University, Melbourne, VIC, Australia

<sup>9</sup> Eastern Health, Melbourne, VIC, Australia

<sup>10</sup> Monash University Eastern Health Clinical School, Melbourne, VIC, Australia

### Corresponding author

Suzanne Chambers, Menzies Health Institute Queensland, Griffith University, Gold Coast Campus, QLD 4222, AUSTRALIA. E-Mail: [suzanne.chambers@griffith.edu.au](mailto:suzanne.chambers@griffith.edu.au)

### Acknowledgements

We thank Elizabeth Eldridge and Leah Zajdlewicz for research assistance. We gratefully acknowledge the men who generously gave their time for this study.

### Funding statement

This research received no specific grant from any funding agency in the public, commercial or not-for-profit sectors. IDD is supported by an NHMRC Practitioner Fellowship (APP1102604).

### Competing interests statement

The authors declare there are no competing interests to declare.

### Data sharing statement

The authors have full control of all primary data and agree to allow the journal to review their data if requested.

**Word count:** 3,997 text not incl. tables, figures or refs (recommended not exceed 4000 max **plus** up to 5 tables or figures).

**Abstract:** 180

## Supportive care needs of men with advanced prostate cancer

**Abstract**

**Objective:** To explore men's lived experience of advanced prostate cancer (PCa) and preferences for support.

**Design:** Cross-sectional qualitative study applying open-ended surveys and interviews conducted between June and November 2016. Interviews audio-recorded, and transcribed verbatim and analysed from an interpretive phenomenological perspective.

Setting: Australia, nation-wide.

**Participants:** 39 men diagnosed with advanced PCa (metastatic or castration-resistant biochemical regression) were surveyed with 28 men subsequently completing a semi-structured in depth telephone interview.

**Results:** Thematic analysis of interviews identified two organising themes; lived experience and supportive care. Lived experience included 6 super-ordinate themes: regret about late diagnosis and treatment decisions; being discounted in the health system; fear/uncertainty about the future; acceptance of their situation; masculinity; and treatment effects. Supportive care included 5 super-ordinate themes: communication; care coordination; accessible care; shared experience/peer support; and involvement of their partner/family.

**Conclusions:** Life course and the health and social context of prostate cancer influence men's experiences of advanced disease. Multimodal interventions integrating peer support and specialist nurses are needed that more closely articulate with men's expressed needs.

**Strengths and limitations of this study**

- Extends previous research in men with advanced PCa to describing how masculinities, life course, and the broader social and public health context influence support needs
- Robust and transparent study method and the application of a phenomenological approach
- Valid and reliable and transferable within the Australian setting
- Cross-sectional design is a study limitation

**Keywords**

Prostate cancer, advanced cancer, metastatic, masculinities, supportive care needs, life course

## Introduction

Prostate cancer (PCa) is the second most common cancer in males with the highest incidence in Australia/New Zealand and North America<sup>1</sup>. Most men present with localised disease or disease with regional lymph nodes spread with the relative 5-year survival rate for these men exceeding 95%<sup>2</sup><sup>3</sup>. However, 1 in 5 will progress to metastatic disease<sup>4</sup>. Approximately 5% of men are diagnosed with metastatic disease and the relative 5-year survival rate for these men is only 30%<sup>3,5</sup>. The mainstay treatment for advanced PCa is androgen deprivation therapy (ADT) that typically is followed by progression to metastatic castration-resistant PCa<sup>6</sup>. Once this occurs, median survival is less than 2 years<sup>7</sup>, although recent therapeutic advancements such as abiraterone acetate and enzalutamide have shown potential for further slowing disease progression<sup>8</sup> with median survival up to 3 years<sup>6</sup>. The STAMPEDE<sup>9</sup> and LATITUDE<sup>10</sup> trials demonstrated a survival advantage for the combined use of abiraterone with commencement of ADT however this was offset by earlier and more prolonged androgen suppression and a higher risk of grade 3 to 5 adverse events.

Hence, while new treatments for advanced PCa prolong life, this means men are living longer with the effects of treatment and disease progression including deteriorating bone health, pain, hot flushes, loss of libido, erectile dysfunction, increased fat mass, sarcopenia, fatigue, and cognitive decline<sup>6,11,12</sup>. Men with advanced PCa have poorer quality of life, higher levels of psychological distress, increased suicide risk, and more unmet supportive care needs compared to men with localised disease<sup>13-16</sup>. Approximately 1 in 4 experience regret about treatment decisions and this is associated with poorer quality of life and increased distress<sup>17</sup>. In sum, the burden associated with advanced PCa is substantial and further evolving as new treatments emerge.

To date there is scant psychosocial or supportive care intervention research directly targeting men with advanced PCa; and the one randomised trial of scale completed by our team failed to prove effectiveness<sup>18,19</sup>. Researchers in Canada and Scotland have previously highlighted the persisting support services gap for men with advanced PCa and suggested more qualitative research elucidating men's experiences is needed if we are to develop effective supportive care interventions<sup>20,21</sup>. Carter et al in 2011 explored the supportive care needs of men with advanced PCa and concluded that functional issues, information needs, and emotional distress were the three domains of need that

## Supportive care needs of men with advanced prostate cancer

needed to be addressed<sup>20</sup>. More recently, Paterson et al (2017) interviewed eight men with advanced PCa describing a broader range of challenges extending to interpersonal and intimacy needs<sup>21</sup>. Both studies emphasised the gap in informational support for these men, however neither deeply explored issues related to masculinities nor the broader social and public health context in which this illness experience is nested<sup>22-24</sup>. We sought to extend this previous work more specifically connecting our enquiry between men's challenges in facing advanced PCa and their preferences for support within their social context. Accordingly, we applied an interpretative phenomenological approach to describe the lived experience of men with advanced PCa (proven metastatic or castration-resistant biochemical regression) and their supportive care preferences.

## Method

### Study design

This study applied a cross-sectional qualitative design. In a first step, participants reflected on their experience with advanced PCa via a mail administered open-ended survey. These responses provided a context to inform development of a protocol to guide subsequent semi-structured in-depth telephone interviews. Consistent with the study aim to describe men's lived experiences in the context of advanced prostate cancer we adopted an interpretative phenomenological perspective<sup>25,26</sup>. Ethical approval was obtained from the Griffith University Human Research Ethics Committee (Reference number 2016/418).

### Participants and recruitment

Participants were recruited from an existing patient cohort<sup>15</sup>. In brief, this was a cohort drawn from treatment centres across Australia with participants from five Australian states. In June 2016 we contacted men who had not withdrawn from the cohort and were not to our knowledge deceased and had consented to future contact (N=141). In all, 39 men returned the survey (28% response) and of these 28 were available for telephone interview between September 2016 and November 2016 (72% response). Similar to the cohort from which participants were drawn, the mean age of participants was 72.7 years (SD=8.5; range 58.2-94.6) with the majority born in Australia (75%), married (86%), and retired (79%); men resided across four Australian states. With regards to educational level, 7 men had a college degree; 15 had a trade or technical certificate/diploma; 2 had completed senior high school

1  
2  
3 and four had completed junior high school. Mean time since diagnosis was 7.7 years (SD=5.0; range  
4 2.1-22.8). Most men were treated with ADT (88%); 73% radiation therapy; 62% prostatectomy. Men  
5 who did not participate were either too unwell (n=4), had a hearing impairment (n=1), or did not  
6 consent (n=6). Table 1 reports sociodemographic characteristics and treatment information for each  
7 interview participant.  
8  
9

### 10 11 12 **Data collection**

13  
14 Men responded to four questions in the survey about their PCa-related concerns; assistance or  
15 support accessed for these concerns and from whom; other support needed; and preferences for  
16 support for men. Thematic analysis<sup>27</sup> of responses (MH, KL, SC) indicated four areas that were  
17 challenging for men and in which they lacked support: information, medical care, side-effects, and the  
18 future. Three experienced female interviewers in a research fellow or research assistant position with  
19 post-graduate training in the behavioural sciences (ML, KL, EE) conducted telephone interviews to  
20 further explore the key areas identified. Interviews were on average 62.1 minutes in length (SD=19.2;  
21 range=29.2 to 111.9 minutes). Member checking occurred at the beginning of each interview during  
22 which the interviewer asked participants to comment on the accuracy of researcher interpretation of  
23 survey results and gave participants the opportunity to add anything they thought had been missed.  
24 Interview questions (Table 2) explored in greater depth the concerns previously identified in men's  
25 survey responses: health system concerns, supportive care needs, barriers to support and preferred  
26 approaches. Participants were invited to discuss other aspects of their experience that they considered  
27 were important. Interviews were audio-recorded and transcribed verbatim.  
28  
29  
30  
31  
32  
33  
34  
35  
36  
37  
38  
39  
40  
41

### 42 **Data analysis**

43  
44 Interview transcripts were analysed using thematic analysis<sup>27,28</sup>. Themes were derived  
45 inductively from the data by reading and re-reading the interview narratives and from this developing  
46 an understanding of men's lived experience through their words. Coders had social and behavioural  
47 science (SC, MH, JD, KL), and nursing (SC) backgrounds with a wide range of experience from two  
48 to 20 years working in psycho-oncology and prostate cancer research and included male and female  
49 researchers. Transcripts were coded iteratively with constant comparison between the codes generated  
50 and the data to ensure that consistent and diverging responses were incorporated. Two research team  
51  
52  
53  
54  
55  
56  
57  
58  
59  
60



## Supportive care needs of men with advanced prostate cancer

1  
2  
3 members independently coded one-third of the transcripts and generated a preliminary coding scheme  
4 (MH, KL). This coding scheme was further refined with a third (SC) and fourth (JD) research team  
5 member. Once all interview transcripts were included the coding scheme was further reviewed and  
6 agreed upon by all coders. Exemplar responses were identified across transcripts to illustrate and  
7 confirm labelling of themes. Reporting of data is consistent with consolidated criteria for reporting  
8 qualitative studies (COREQ) guidelines<sup>29</sup>.  
9  
10  
11  
12  
13

## 14 Results

15  
16 Thematic analysis identified two organising themes: lived experience and supportive care.  
17 The first organising theme reflected men's lived experience with advanced PCa, and within this six  
18 super-ordinate themes. The second organising theme captured elements of supportive care that men  
19 found challenging and their preferences for how care should be delivered with five super-ordinate  
20 themes. Figure 1 depicts the coding structure. Tables 3 and 4 present illustrative quotes for each  
21 super-ordinate theme.  
22  
23  
24  
25  
26  
27

### 28 Lived experience

29  
30 Men's lived experience with advanced PCa included six super-ordinate themes: regret about  
31 late diagnosis and treatment decisions; being discounted in the health system; fear/uncertainty about  
32 the future; acceptance of their situation; masculinity; and treatment effects (Table 3).  
33  
34  
35

#### 36 *Regret about late diagnosis and treatment decisions*

37  
38 Most men described feeling regret about late diagnosis or treatment and this was commonly  
39 attributed to delays by clinicians. Many men perceived these delays were caused by general  
40 practitioners and/or specialists who would not perform digital rectal examinations (DREs) or prostate-  
41 specific antigen (PSA) testing; did not detect PCa until it was well advanced despite regular testing;  
42 and did not refer patients for further treatment or testing in a timely manner despite men's requests for  
43 them to do so. From this, some men were left with a distrust of the medical profession. Many men  
44 also discussed regretting their treatment choices and not having had a second opinion so that they felt  
45 more adequately informed and clearly understood the outcomes of treatment, including side effects,  
46 and how these could be managed.  
47  
48  
49  
50  
51  
52  
53  
54  
55

#### 56 *Being discounted in the health system*

## Supportive care needs of men with advanced prostate cancer

1  
2  
3 In their interactions with clinicians, most men described their concerns, needs and autonomy  
4 as discounted or ignored. Many men felt devalued and believed they were somehow less important in  
5 the broader health system. In their experience, PCa was the ‘poor cousin’ of breast cancer in terms of  
6 funding, research focus, and controversy over the value of PSA testing; and less effort by the  
7 government and non-profits to promote awareness of PCa. Some men also considered that they and  
8 their cancer were less important due to their older age and community attitudes where PCa is  
9 considered a cancer that may not lead to death.

***Fear/uncertainty about the future***

10  
11 An uncertain future was discussed in terms of most men needing to make ‘the unknowable’ a  
12 known entity by understanding how much time they may have left to live; what lies ahead for disease  
13 progression and quality of life; potential treatment options; and next steps for support when all  
14 treatment options had been exhausted. This information was critical to their ability to feel more in  
15 control and to prepare for the future both psychologically and practically while they were well enough  
16 to do so. By contrast, some men discussed not wanting to know what the future held in order to focus  
17 on their day-to-day life.

***Acceptance***

18  
19 Many men used their age as a frame to accept physical changes and the threat to their  
20 mortality. Other approaches adopted by many men to reach acceptance were focusing on ‘getting on  
21 with it’, and viewing ongoing physical effects of the disease or its treatment as part of life, an  
22 inevitable outcome of treatment or disease progression, and as a favourable alternative to death.  
23 Regarding sexuality, some men found changes in their physical capacity to have sex an ongoing cause  
24 of distress. Other men shifted their focus to other aspects of their relationships (e.g., expressing  
25 intimacy in ways that do not require an erection) as a way to accept their situation.

***Masculinities***

26  
27 Male values and masculinities were discussed as central to most men’s experience of PCa,  
28 support, and coping. Many men believed that as a group they do not look after themselves, go to the  
29 doctor, ask for help, or talk about their problems by comparison to women, and have a different view  
30 on their health, are less prepared to discuss their health, and gave health less attention. This reluctance

## Supportive care needs of men with advanced prostate cancer

1  
2  
3 to seek help or support or talk about their problems was ascribed to male values around being strong,  
4 capable, independent/autonomous, or stoic. Many men used avoidance as a coping approach by  
5 avoiding thinking or talking about their situation, and covering up or ignoring side-effects or a need  
6 for support. Some men expressed concerns that there would be negative consequences socially or in  
7 their employment if others knew about their cancer. Privacy and being embarrassed talking about  
8 personal issues were also raised by many men. Viewing sexuality and sexual function as important to  
9 their identity as a man meant that some men were deeply troubled by changes in sexuality; and  
10 believed that their relationship with their partner now would be negatively impacted or that it would  
11 no longer be possible for them to start new relationships with women.

12  
13  
14  
15  
16  
17  
18  
19  
20  
21 In their perceived role as ‘the provider’ and ‘the protector’, some men expected to give help  
22 rather than receive it. Some men tried to protect their wives or their family by not talking about their  
23 problems and thus avoid worrying them. Many also adopted approaches to promote adjustment  
24 including being optimistic and ‘getting on with it’; taking responsibility for their health and well-  
25 being (e.g., remaining physically active); as well as an action-oriented approaches in which they  
26 identified and solved problems directly or sought help or support. In using these approaches, men  
27 saw themselves not constrained by masculine norms constraining help seeking. Many men devalued  
28 ‘talk’ as a way to obtain support and viewed psychologists as not able to provide the solutions they  
29 needed, also describing unfavourable attitudes towards support groups as an opportunity for self-pity  
30 or drama.

### 31 32 33 34 35 36 37 38 39 40 ***Treatment effects***

41  
42 All men discussed the effects of advanced PCa and its treatment that affected their quality of  
43 life, relationships, capacity to do daily tasks, and for many men were highly distressing. Prominent  
44 amongst these were physical effects and financial concerns. Physical effects included the inability to  
45 obtain an erection; lack of libido; urinary incontinence; changes in appearance and bodily structure  
46 including gynecomastia; weight gain; sarcopenia; decreased bone density; fatigue; dizziness; loss of  
47 balance; breathlessness; hot flushes; cognitive changes; and pain. Some men discussed no longer  
48 being well enough to work and that this negatively affected their income and retirement plans.

### 49 50 51 52 53 54 55 56 **Supportive care**

1  
2  
3 The organising theme supportive care included five super-ordinate themes: communication;  
4 care coordination; accessible care; shared experience/peer support; and involvement of their  
5 partner/family (Table 4).  
6  
7

### 8 ***Communication***

9  
10 Men had mixed experiences in their interactions and communication with health  
11 professionals. Four pivotal points in the care trajectory in which effective communication appeared  
12 most critical were: diagnosis; deciding on treatment options; treatment effects and symptom  
13 management; follow-up care. Many men described being unclear about the specifics of their  
14 diagnosis (e.g., staging, PSA) whereas, by contrast, some men appreciated the direct and honest  
15 approach adopted by their clinicians when communicating about the severity of their disease. When  
16 discussing treatment options, men desired more guidance and support in making a treatment decision;  
17 and for options to be more clearly communicated so that they could better understand long-term  
18 treatment effects. Some men were dismayed that their GPs or other health professionals did not seem  
19 to have specialised knowledge about PCa. Preferred decision support included clear, unbiased  
20 communication about the pros and cons of each treatment option and referral to other sources of  
21 information that men could consider in their own time.  
22  
23  
24  
25  
26  
27  
28  
29  
30  
31  
32  
33

34 Some men described confusion and frustration when they were given a treatment that they  
35 needed to self-administer (e.g., injections) but were not effectively instructed in how to do this. Men  
36 commonly discussed health professionals' communication about treatment side-effects as insufficient  
37 (e.g., told about effects but not how to deal with them) and selective (e.g., told about immediate but  
38 not long-term effects), and as a consequence felt unprepared and isolated in their experience. Some  
39 men described not being listened to when they raised their concerns or being unable to get clear  
40 answers to questions. Some men expressed that it was up to them to find solutions to manage their  
41 side-effects because clinicians did not adequately address these.  
42  
43  
44  
45  
46  
47  
48  
49

### 50 ***Care Coordination.***

51  
52 For some men, regular ongoing communication with their clinicians was a source of support,  
53 however other men felt out of touch and isolated due to the length of time between each consultation.  
54 GPs were important to some men in helping them feel connected with their care team. Most men  
55  
56  
57  
58  
59  
60

## Supportive care needs of men with advanced prostate cancer

1  
2  
3 discussed the need for better coordinated care and information and this was focused on three aspects:  
4 communication between health professionals; having a 'middle man'; and integrating psychosocial  
5 support as part of routine care.  
6  
7

8  
9 A lack of communication between specialist clinicians regarding treatment and referral was  
10 discussed by many men as problematic. Men had mixed views as to who should be the central point  
11 of call for information and referral. Some men believed this should be their GP; others suggested their  
12 urologist or oncologist. Patient advocates or navigators were also discussed by some men as an  
13 option to help streamline and clarify the diagnostic and treatment process. Some men discussed PCa  
14 nurses as being central to their care. Nurses provided informational, emotional, and practical support  
15 that clarified men's understanding of their situation; served as an intermediary between the patient or  
16 couple and other clinicians; and were seen as more likely to refer them to other beneficial services  
17 than other health care professionals. These men discussed that the best time to be connected with a  
18 PCa nurse was at diagnosis with continued access throughout treatment.  
19  
20  
21  
22  
23  
24  
25  
26  
27

28  
29 Some men identified the need to integrate psychosocial support as part of routine care without  
30 relying on men themselves to raise emotional issues with clinicians. Alongside this, some men also  
31 discussed the need for routine referral to support groups or information about the existence of local  
32 groups; and exercise programs as helpful for weight gain and muscle wastage and managing feelings  
33 of loss of masculinity.  
34  
35  
36  
37

***Accessible care***

38  
39  
40 Many men discussed three main barriers to accessible care: geographic location; ill health and  
41 financial cost of treatment. Some men experienced difficulty accessing services because they resided  
42 in a regional or rural location where services were either not available or required them to travel long  
43 distances with resultant cost and inconvenience. Some men had difficulty or were prevented from  
44 accessing central or nearby services due to ill health or fatigue; and some men discussed the high  
45 financial cost of treatments or drugs to manage side-effects such as erectile dysfunction and  
46 uncertainty about how to cover these costs. To overcome accessibility issues, these men suggested  
47 use of online or telephone services for those in rural or regional areas or who could not access care  
48  
49  
50  
51  
52  
53  
54  
55  
56  
57  
58  
59  
60

## Supportive care needs of men with advanced prostate cancer

1  
2  
3 due to ill health; lobbying the government to subsidise financial costs of treatment; and increasing the  
4  
5 availability of home-based medical care or practical assistance services.

***Shared experience/peer support***

6  
7  
8 The opportunity to talk to other men in the same situation was discussed by most men as a  
9  
10 source of support that they had or wished they had an awareness of and access to. Three aspects of  
11  
12 shared experience/peer support: benefits; delivery preferences; and barriers were described. Shared  
13  
14 experience was highly valued by most men because it allowed them to talk to someone who had been  
15  
16 through the same experience; obtain information or advice when weighing up treatment decisions or  
17  
18 managing side effects; make positive upward (e.g., other men doing well and inspiring hope for  
19  
20 recovery) or downward (e.g., other men are doing worse so I am ok) comparisons<sup>30</sup>; gave men a safe  
21  
22 and confidential forum to express their concerns; and helped men to feel less alone. However, some  
23  
24 men did not always describe the concept of shared mutual experience as peer support or being  
25  
26 connected to support groups. Rather, mutual support also occurred through companionship with other  
27  
28 men who did not have cancer such as at Men's Sheds and social or sporting clubs.

29  
30 Most men proposed different delivery methods for peer support (e.g., face-to-face, telephone,  
31  
32 or online) to take into account individual differences and need for privacy or anonymity. Both  
33  
34 structured (e.g., with a facilitator and an agenda) and unstructured (e.g., a chat over coffee) methods  
35  
36 were acceptable. Some men preferred shared experiences specifically for men with advanced disease  
37  
38 on the basis that men with localised disease have different treatments and cancer-related physical  
39  
40 effects.

41  
42 Finally, despite acknowledging the benefits of shared experience, many men also discussed  
43  
44 barriers to peer support use. These included feeling uncomfortable to share in a group; the difficulty  
45  
46 of sustaining support groups; death of peers; and the belief that support groups were focused only on  
47  
48 emotional or psychological information.

***Involvement of partner/family***

49  
50  
51 In addition to shared experience, most men identified partners and/or family and friends as  
52  
53 sources of support that contributed to their emotional and physical wellbeing. For most men, female  
54  
55 partners were their main source of emotional and practical support. Many men discussed that partners  
56  
57

## Supportive care needs of men with advanced prostate cancer

1  
2  
3 were impacted by the diagnosis and treatment of PCa and believed it was important to involve and  
4 support partners in their care. Some men commented that partners are often the catalyst for their  
5 involvement in support groups or seeking out information/ support from other sources. Broader  
6 family and friends were also discussed by some men as sources of support, often providing practical  
7 assistance.  
8  
9  
10  
11

### 12 Discussion

13  
14 The present study extends previous research about the experience of men with advanced PCa,  
15 adding an additional level of description that provides insight into how health context influences  
16 men's responses; the influence of life course; and ways in which masculinities is expressed in this  
17 setting. As in previous research, difficulties with accessible informational support about the disease  
18 and its treatment were highly evident<sup>20 21 31</sup>. That these problems persist and are remarkably similar  
19 in Canada<sup>20</sup>, Scotland<sup>21</sup>, and in our Australian data, is striking and suggests that globally there may  
20 be a gap in health systems' responses to advanced PCa. PCa survivorship research has to date been  
21 underfunded by comparison to breast cancer<sup>32</sup>; a consensus about clinical care for advanced PCa is  
22 just now emerging<sup>33</sup>; and the historical and persistent debate about the early detection of prostate  
23 cancer<sup>24 34</sup> are likely contributors to this. The men's reports in our study of PCa having a less  
24 favourable public profile reflect this and show how the broader public health and social context can  
25 have a profound negative impact on an already difficult cancer experience.  
26  
27  
28  
29  
30  
31  
32  
33  
34  
35  
36  
37

38 The influence of life course in response to illness in terms of men's age and the expression of  
39 masculinities and masculine models of coping strongly emerged in this study and this has implications  
40 for the design of care models<sup>35</sup>. We propose that there is a need to newly conceptualise and then  
41 deliver what men actually want, rather than starting from a first principle of revising services already  
42 provided that are not meeting men's needs. Men underutilise psychosocial support services after  
43 cancer compared to women with breast cancer<sup>36</sup>; and previous research has suggested that  
44 interventions promoting self-management in men with chronic diseases should include action oriented  
45 approaches if they are to be utilised<sup>37 38</sup>. With regards to providers of support, men in the present  
46 study proposed both peer support and nurse specialists as preferred care providers, confirming  
47 previous research<sup>39</sup>.  
48  
49  
50  
51  
52  
53  
54  
55  
56  
57  
58  
59  
60

1  
2  
3 Limitations of this study include the cross sectional design. Recent qualitative research  
4 applying a prospective study design proposed that coping with advanced cancer evolves over time as  
5 symptoms progress and fluctuate<sup>40</sup>. Future research utilising a prospective case study design will add  
6 further depth to our understanding of men's experiences in the face of advancing PCa. As well, the  
7 men in our study were not newly diagnosed with advanced disease and so reports of their experience  
8 at the time of diagnosis or initial disease progression are retrospective and subject to recall bias.  
9  
10 Strengths include a robust and transparent study method and the involvement of men **across four**  
11 Australian states with varied sociodemographic backgrounds such that our data can be considered  
12 broadly relevant across the Australian setting. We do note that our participant group was not  
13 ethnically diverse and so likely does not represent these experiences, that have been well described  
14 elsewhere<sup>41</sup>.

15  
16  
17  
18  
19  
20  
21  
22  
23  
24 Based on our previous research<sup>18 42</sup> and the present results we propose five key content  
25 elements for inclusion in supportive care interventions with men with advanced PCa: decision  
26 support; treatment education with self-management and skills training for symptoms, including  
27 exercise prescription; routine screening for psychological distress with referral; psycho-education  
28 with tailored distress management strategies; communicating with health professionals. Strategies to  
29 integrate peer support within the care team are needed. Finally, the prostate cancer specialist role  
30 presents as highly acceptable to men and is ideally placed for supportive care delivery and care  
31 coordination<sup>43</sup>.

32  
33  
34  
35  
36  
37  
38  
39  
40 In conclusion, supportive care services for men with advanced PCa need to be multimodal  
41 and take into account the influence of life course on men's illness experience. There is a need for the  
42 health system to prioritise research and development in clinical PCa care taking a more holistic  
43 approach than currently exists.  
44  
45  
46  
47  
48  
49

#### 50 **Author contributions**

51 SC, JD and MH conceived the study, developed the interview protocol, undertook the analyses and  
52 interpretation, and led manuscript development. KL recruited and interviewed participants, undertook  
53 analysis and contributed to writing the manuscript. ML recruited and interviewed participants. MF, ID  
54 and AL contributed to data interpretation. All authors contributed to revisions and approved the final  
55 manuscript.  
56  
57  
58  
59  
60



## References

1. Ferlay J, Soerjomataram I, Ervik M, et al. GLOBOCAN 2012 v1. 0, Cancer Incidence and Mortality Worldwide: IARC CancerBase No. 11. Lyon, France: International Agency for Research on Cancer; 2013 [Available from: [globocan.iarc.fr/Default.aspx](http://globocan.iarc.fr/Default.aspx) accessed 8th April 2017].
2. Australian Institute of Health and Welfare. Cancer in Australia 2017. Cancer series no. 101. Cat. No. CAN 100. Canberra, Australia: AIHW 2017.
3. National Cancer Institute. SEER Cancer Stat Facts: Prostate Cancer Bethesda, MD: National Cancer Institute; 2016 [Available from: <http://seer.cancer.gov/statfacts/html/prost.html> accessed 8th April 2017].
4. Luo Q, Yu XQ, Smith DP, et al. A population-based study of progression to metastatic prostate cancer in Australia. *Cancer Epidemiology* 2015;39(4):617-22. doi: 10.1016/j.canep.2015.04.013
5. American Cancer Society. Cancer Facts & Figures 2017. Atlanta,GA: American Cancer Society, 2017.
6. Crawford ED, Petrylak D, Sartor O. Navigating the evolving therapeutic landscape in advanced prostate cancer. *Urologic Oncology: Seminars and Original Investigations* 2017;35:S1-S13. doi: 10.1016/j.urolonc.2017.01.020
7. Heidenreich A, Bastian PJ, Bellmunt J, et al. Guidelines on prostate cancer. 2012: European Association of Urology., 2012.
8. Afshar M, Evison F, James ND, et al. Shifting paradigms in the estimation of survival for castration-resistant prostate cancer: A tertiary academic center experience. *Urologic Oncology: Seminars and Original Investigations* 2015;33(8):338-e1. doi: 10.1016/j.urolonc.2015.05.003
9. James ND, de Bono JS, Spears MR, et al. Abiraterone for prostate cancer not previously treated with hormone therapy. *New England Journal of Medicine* 2017;377:338-51. doi: 10.1056/NEJMoa1702900
10. Fizazi K, Tran N, Fein L, et al. Abiraterone plus prednisone in metastatic, castration-sensitive prostate cancer. *New England Journal of Medicine* 2017;377:352-60. doi: 10.1056/NEJMoa1704174
11. Gilbert DC, Duong T, Kynaston HG, et al. Quality - of - life outcomes from the Prostate Adenocarcinoma: TransCutaneous Hormones (PATCH) trial evaluating luteinising hormone - releasing hormone agonists versus transdermal oestradiol for androgen suppression in advanced prostate cancer. *BJU International* 2017;119(5):667-75. doi: 10.1111/bju.13687
12. Resnick MJ, Penson DF. Quality of Life with Advanced Metastatic Prostate Cancer. *Urologic Clinics of North America* 2012;39(4):505-15. doi: <https://doi.org/10.1016/j.ucl.2012.07.007>
13. Bill-Axelsson A, Garmo H, Lambe M, et al. Suicide risk in men with prostate-specific antigen-detected early prostate cancer: a nationwide population-based cohort study from PCBaSe Sweden. *European Urology* 2010;57(3):390-95.
14. Bloch S, Love A, Macvean M, et al. Psychological adjustment of men with prostate cancer: a review of the literature. *BioPsychoSocial Medicine* 2007;1(1):2.
15. Chambers SK, Occhipinti S, Foley E, et al. Mindfulness-based cognitive therapy in advanced prostate cancer: a randomized controlled trial. *Journal of Clinical Oncology* 2016;35(3):291-97. doi: 10.1200/JCO.2016.68.8788
16. Eton DT, Lepore SJ. Prostate cancer and health - related quality of life: a review of the literature. *Psycho - Oncology* 2002;11(4):307-26.
17. Clark JA, Wray NP, Ashton CM. Living with treatment decisions: regrets and quality of life among men treated for metastatic prostate cancer. *J Clin Onc* 2001;19(1):72-80.
18. Chambers S, Hyde M, Smith D, et al. A Systematic Review of Psychological Interventions for Prostate Cancer Survivors and Their Partners: Clinical and Research Implications. *Psycho-Onc* 2017;26(7):873-913. doi: 10.1002/pon.4431

19. Chambers SK, Occhipinti S, Foley E, et al. Mindfulness-Based Cognitive Therapy in Advanced Prostate Cancer: A Randomized Controlled Trial. *J Clin Onc* 2017;35(3):291-97. doi: doi:10.1200/JCO.2016.68.8788
20. Carter N, Bryant-Lukosius D, DiCenso A, et al. The supportive care needs of men with advanced prostate cancer. *Oncol Nurs Forum* 2011;38(2):189-98. doi: 10.1188/11.ONF.189-198
21. Paterson C, Kata RSG. Unmet Supportive Care Needs of Men With Locally Advanced and Metastatic Prostate Cancer on Hormonal Treatment. 2017 doi: 10.1097/NCC.0000000000000482.
22. Chambers S, Hyde M, Zajdlewicz L, et al. Measuring Masculinity in the Context of Chronic Disease. *Psychology of Men & Masculinity* 2015;17(3):228-42. doi: 10.1037/men0000018
23. Chambers SK, Chung E, Wittert G, et al. Erectile dysfunction, masculinity, and psychosocial outcomes: a review of the experiences of men after prostate cancer treatment. *Translational Andrology and Urology* 2017;6(1):60-68. doi: 10.21037/tau.2016.08.12
24. Dunn J, Casey C, Sandoe D, et al. Advocacy, support and survivorship in prostate cancer. *Eur J Cancer Care* 2017:e12644-n/a. doi: 10.1111/ecc.12644
25. Davidsen AS. Phenomenological Approaches in Psychology and Health Sciences. *Qualitative Research in Psychology* 2013;10(3):318-39. doi: 10.1080/14780887.2011.608466
26. Lopez KA, Willis DG. Descriptive Versus Interpretive Phenomenology: Their Contributions to Nursing Knowledge. *Qualitative Health Research* 2004;14(5):726-35. doi: 10.1177/1049732304263638
27. Braun V, Clarke V. Using thematic analysis in psychology. *Qualitative research in psychology* 2006;3(2):77-101. doi: 10.1191/1478088706qp063oa
28. Wojnar DM, Swanson KM. Phenomenology: An Exploration. *Journal of Holistic Nursing* 2007;25(3):172-80. doi: 10.1177/0898010106295172
29. Tong A, Sainsbury P, Craig J. Consolidated criteria for reporting qualitative research (COREQ): a 32-item checklist for interviews and focus groups. *International Journal for Quality in Health Care* 2007;19(6):349-57.
30. Wood JV. Theory and research concerning social comparisons of personal attributes. *Psychological Bulletin* 1989;106(2):231-48. doi: 10.1037/0033-2909.106.2.231
31. Jenkins V, Fallowfield L, Jenkins VA, et al. No man's land: information needs and resources of men with metastatic castrate resistant prostate cancer. *Support Care Cancer* 2016;24(11):4471-73. doi: 10.1007/s00520-016-3358-0
32. AIHW. Cancer in Australia 2010: an overview. In: Australian Institute of Health and Welfare, ed. Canberra: Australian Institute of Health and Welfare, 2010.
33. Gillessen S, Attard G, Beer TM, et al. Management of Patients with Advanced Prostate Cancer: The Report of the Advanced Prostate Cancer Consensus Conference APCCC 2017. *European Urology* 2017 doi: 10.1016/j.eururo.2017.06.002
34. Lepor H. Opinion Makers: Revisiting the USPSTF Decision on PSA Tests - Urologist Herbert Lepor, MD, sets forth 'sensible solution' *Medpage Today* 2016.
35. Evans J, Frank B, Oliffe JL, et al. Health, Illness, Men and Masculinities (HIMM): a theoretical framework for understanding men and their health. *Journal of Men's Health* 2011;8(1):7-15. doi: 10.1016/j.jomh.2010.09.227
36. Forsythe LP, Kent EE, Weaver KE, et al. Receipt of psychosocial care among cancer survivors in the United States. *J Clin Onc* 2013;31(16):1961-9. doi: 10.1200/jco.2012.46.2101
37. Galdas PM, Cheater F, Marshall P. Men and health help-seeking behaviour: literature review. *J Adv Nurs* 2005;49(6):616-23. doi: 10.1111/j.1365-2648.2004.03331.x
38. Roesch SC, Adams L, Hines A, et al. Coping with prostate cancer: a meta-analytic review. *Journal of Behavioral Medicine* 2005;28(3):281-93.
39. King AJL, Evans M, Moore THM, et al. Prostate cancer and supportive care: a systematic review and qualitative synthesis of men's experiences and unmet needs. *Eur J Cancer Care* 2015;24(5):618-34. doi: 10.1111/ecc.12286
40. Roberts D, Calman L, Large P, et al. A revised model for coping with advanced cancer. Mapping concepts from a longitudinal qualitative study of patients and carers coping with advanced cancer onto Folkman and Greer's theoretical model of appraisal and coping. *Psycho-Onc*:n/a-n/a. doi: 10.1002/pon.4497

## Supportive care needs of men with advanced prostate cancer

- 1  
2  
3 41. Rivas C, Matheson L, Nayoan J, et al. Ethnicity and the prostate cancer experience: a qualitative  
4 metanalysis. *Psycho-Onc* 2016;25(10):1147-56. doi: 10.1002/pon.4222  
5 42. Zopf EM, Newton RU, Taaffe DR, et al. Associations between aerobic exercise levels and  
6 physical and mental health outcomes in men with bone metastatic prostate cancer: a cross-  
7 sectional investigation. *Eur J Cancer Care* 2016:n/a-n/a. doi: 10.1111/ecc.12575  
8 43. Carter N, Miller PA, Murphy BR, et al. Healthcare providers' perspectives of the supportive care  
9 needs of men with advanced prostate cancer. *Oncol Nurs Forum*, 2014:421+.

**Figure Legend**

10  
11  
12  
13  
14 Figure 1. Coding structure derived from thematic analysis  
15  
16  
17  
18  
19  
20  
21  
22  
23  
24  
25  
26  
27  
28  
29  
30  
31  
32  
33  
34  
35  
36  
37  
38  
39  
40  
41  
42  
43  
44  
45  
46  
47  
48  
49  
50  
51  
52  
53  
54  
55  
56  
57  
58  
59  
60

**Table 1**

Sociodemographic characteristics and treatment information for participants completing an open-ended survey and telephone interview

N = No; NR = Not reported; W = Widowed (married at time of diagnosis); Y = Yes.

TABLE REMOVED TO MAINTAIN PARTICIPANTS CONFIDENTIALITY

For peer review only

## Supportive care needs of men with advanced prostate cancer

**Table 2**

Interview questions

| Focus area            | Question                                                                                                                                                                                                                                                       |
|-----------------------|----------------------------------------------------------------------------------------------------------------------------------------------------------------------------------------------------------------------------------------------------------------|
| Health system         | Thinking about your medical treatment, what changes do you feel would make medical services better meet the needs of men with advanced prostate cancer?                                                                                                        |
| Supportive Care Needs | Thinking about the treatment side effects that a man with advanced prostate cancer might experience, what sort of support would help most?                                                                                                                     |
|                       | Thinking about the future and the worries that face a man with prostate cancer that has advanced or recurred, what sort of support would help most?                                                                                                            |
| Barriers              | In developing services to help men cope or manage better with advanced prostate cancer, can you describe support approaches or ways of helping that would <b>not</b> be acceptable to men? For example, supportive approaches that would turn men off or away? |
| Preferred approaches  | In developing services to help men cope or manage better with advanced prostate cancer, can you describe support approaches or ways of helping that would be more attractive to men?                                                                           |
| Other                 | Thinking about what we have spoken about today, is there anything else we haven't covered that you think is important to supporting men with advanced prostate cancer?                                                                                         |

**Table 3**

Lived experience organising theme and super-ordinate themes

| Super-ordinate theme                                | Exemplar quotes                                                                                                                                                                                                                                                                                                                                                                                                                                                                                                                                                                                                                                                                                                                                                                                                                                                                                                                                                                                                                                                                                                                                                                                                                                                                                                                                                                                                                                              |
|-----------------------------------------------------|--------------------------------------------------------------------------------------------------------------------------------------------------------------------------------------------------------------------------------------------------------------------------------------------------------------------------------------------------------------------------------------------------------------------------------------------------------------------------------------------------------------------------------------------------------------------------------------------------------------------------------------------------------------------------------------------------------------------------------------------------------------------------------------------------------------------------------------------------------------------------------------------------------------------------------------------------------------------------------------------------------------------------------------------------------------------------------------------------------------------------------------------------------------------------------------------------------------------------------------------------------------------------------------------------------------------------------------------------------------------------------------------------------------------------------------------------------------|
| Regret about late diagnosis and treatment decisions | <p data-bbox="667 402 1906 591">“I saw a GP and first of all, I think it was 1.9 was my PSA reading, and when it got to 14 I said to him – everything I read tells me that I should be seeing a specialist. And he said, “Oh you worrywart, don’t worry about it,” and then next time I said it, he said, “All right I’ll send you to see [...] he’s a urologist.” I went to see his specialist mate, and he said, “Bloody hell, where’ve you been, you should’ve been here three years ago.” Because it’d been like that for three or four years. The prostate was full of cancer, and it escaped outside the prostate and went into my lymph nodes, because of all that time wasted.” (P31)</p> <p data-bbox="667 597 1906 678">“My only regret was that I didn’t get enough information at the beginning, or, hey, maybe I did, but I was never comfortable with the fact that I had really learnt everything that there was to learn about it before I actually made decisions, and I may or may not have made the wrong one.” (P32)</p>                                                                                                                                                                                                                                                                                                                                                                                                                 |
| Being discounted in the health system               | <p data-bbox="667 688 1906 841">“The men seemed to think that prostate cancer was a B grade compared to other cancers. Because it was older men, and they’d had their run probably. No-one’s going to worry too much about it... Usually men who have got prostate cancer are old, older men and certainly you wouldn’t all the funding going to the old men and not the young women, or middle-aged women. It wouldn’t be fair would it. So we thought that the prostate cancer people were sort of the poor relations in both attitude, funding, in a lot of ways. But you can’t change it.” (P26)</p> <p data-bbox="667 847 1906 906">“They treat you more as a joke, yeah, and the last time I spoke to him about it– I tried to find out am I going to have a lot of pain, is my bones going to break or whatever? He said: You’ll probably die of pneumonia.”(P6)</p> <p data-bbox="667 912 1906 1062">“I just got the impression that the patient was just a number, the name didn’t matter, in fact, we won’t even involve the patient in the discussion, they’re there but we’ve just got a number for him on the records and when they come around to your bed the team, which could be a half a dozen or 10 or even more depending on how many people they’ve got on the day, they just start talking about the condition you’ve got, absolutely nothing, no mention of you yourself being the patient, they don’t even recognise you.” (P20)</p> |
| Fear/uncertainty about the future                   | <p data-bbox="667 1071 1906 1346">“I’d just like to know where I’m headed. I guess he can’t tell me what’s going to happen with the disease, but I’d imagine there must be a pattern, a reasonable pattern of what happens. I mean, with some illnesses you know this is going to progress from this to that, to that, but an article I saw recently in a support group pamphlet was, if you took Drug X tablets, when they stopped working, you took Drug Y tablets. When they stopped working, the next thing on the - on the ladder was death, d-e-a-t-h. Well, I’ve been taking Drug X for quite a while. I’ve been taking Drug Y for quite a while. Each had a definite effect on my PSA, each lost that effect. So really, the next thing that faces me is death. Now, so, it was four months ago that my oncologist gave me, he said, “You’ll see your birthday.” Well, that’s only three months away, it’s only two months away actually. What’s going to happen between now and then?” (P6)</p>                                                                                                                                                                                                                                                                                                                                                                                                                                                     |

Supportive care needs of men with advanced prostate cancer

For peer review only

1  
2  
3  
4  
5  
6  
7  
8  
9  
10  
11  
12  
13  
14  
15  
16  
17  
18  
19  
20  
21  
22  
23  
24  
25  
26  
27  
28  
29  
30  
31  
32  
33  
34  
35  
36  
37  
38  
39  
40  
41  
42  
43  
44  
45  
46  
47

## Supportive care needs of men with advanced prostate cancer

|                   |                                                                                                                                                                                                                                                                                                                                                                                                                                                                                                                                                                                                                                                                                                                                                                                                                                                                                                                                                                                                                                                                                                                                                                                                                                                                                                                                                                                                                                                                                                                                                                                                                                                                                                                                                                                                                                                                                                                                                                                                                                                                 |
|-------------------|-----------------------------------------------------------------------------------------------------------------------------------------------------------------------------------------------------------------------------------------------------------------------------------------------------------------------------------------------------------------------------------------------------------------------------------------------------------------------------------------------------------------------------------------------------------------------------------------------------------------------------------------------------------------------------------------------------------------------------------------------------------------------------------------------------------------------------------------------------------------------------------------------------------------------------------------------------------------------------------------------------------------------------------------------------------------------------------------------------------------------------------------------------------------------------------------------------------------------------------------------------------------------------------------------------------------------------------------------------------------------------------------------------------------------------------------------------------------------------------------------------------------------------------------------------------------------------------------------------------------------------------------------------------------------------------------------------------------------------------------------------------------------------------------------------------------------------------------------------------------------------------------------------------------------------------------------------------------------------------------------------------------------------------------------------------------|
| Acceptance        | <p>“I think acceptance. That would be the word that comes to mind. Not resignation, big difference in my mind between resignation and acceptance, but okay, I accept it, to live a bit longer, or feel a bit better. This is what happens, I've just got to come to terms with it the best way I can. I didn't handle it too well. I think even at that age, you think you're indestructible. Gees, it did happen. But, it's not the end of the world and that's the attitudinal part, I think, more so than – attitude in retrospect, acceptance and spirituality part of it...I can possibly liken it, sort of, something akin to grief counselling is what I needed. You know, there's anger, there's frustration, everything. The whole gambit. It's all there. It's like, okay, it's passed away now, you know, let it rest...I just assumed, pop a couple of Viagra, you'll be right. But, no. So, yeah, it's – yeah and that's a problem after being very active for such a long time with a beautiful wife, it's really hard, really hard to take.” (P30)</p>                                                                                                                                                                                                                                                                                                                                                                                                                                                                                                                                                                                                                                                                                                                                                                                                                                                                                                                                                                                           |
| Masculinity       | <p>“Partly, I think, the reluctance of men to talk about their health, or to talk about personal issues that the idea of maleness, being able to be stoic and cope, type of thing. And just in the idea of maleness, that, sort of, men don't cry, men are stoic, or you get on and cope with things, a lot of men have not been exposed to talking about personal matters and so find it difficult to do that.” (P9)</p>                                                                                                                                                                                                                                                                                                                                                                                                                                                                                                                                                                                                                                                                                                                                                                                                                                                                                                                                                                                                                                                                                                                                                                                                                                                                                                                                                                                                                                                                                                                                                                                                                                       |
| Treatment effects | <p>“I'm impotent, and that – put it this way, that's – honestly, that's something that I have an extremely hard time coming to terms with. My wife and I had a fantastic sex life but that's gone and there's now – yeah, it's probably as much my fault as hers but there's just nothing left of our marriage; we live together but that's about it.” (P38)</p> <p>“I can't even walk down the beach, put out – not having to urinate a couple of times, I take my dog for a pretty long walk each day and I'm looking over my shoulder and I'm always thinking one day I'm going to get busted and someone's going to call me a dirty old man and are they going to even be prepared to listen to the fact that I've had prostate cancer and it's not my fault?” (P14)</p> <p>“Eating is a problem, I have a problem eating. I don't really want to eat but I more or less force myself to eat, because I have no energy, but I've lost, I think, it's 40 kilos all together, but that's over a period. When I look in the mirror I see this gaunt face looking at – I thought I was fairly good looking for an old bloke but now I really look bloody painful, I take notice, like, god I'm gaunt. And I really am thin.” (P19)</p> <p>“The general fatigue, loss of energy, loss of muscle tone, the hormonal issues were probably the biggest ones. I've got osteoporosis because – it's only at the early stage, but my bone density is checked regularly, but it's dropping slowly even though I do exercise, walk a lot and keep my weight down and exercises up. I do that sort of thing all the time. But I'm probably holding it in check. But that one's always a bit of a concern. I've got to be careful I don't fall off the roof, I don't do something, don't break anything nowadays. In fact I – when I finished radiation therapy I felt all pretty smart and I went running on the rocks at the beach one day, and jumped from one rock to another, and snapped my ankle so badly it had to be screwed up with screws and braces.” (P5)</p> |



## Supportive care needs of men with advanced prostate cancer

---

“I now have gynecomastia which I’ve discussed with my GP and my specialist. I was looking at having my breasts removed, unfortunately which I would’ve had to pay for, but I was told that if I did, they would come back so it would be a waste of time and effort and money doing it.” (P38)

“I know the cancer’s spreading. I woke up this morning about 4 o’clock with pains in my pelvic, where it is, the pelvic bone where I suspect the cancer’s moving to. They said it would at the Cancer Clinic, so that gave me a bit of pain. But I find if I take Panadol, one of these Panadols – I take two at night and two in the morning and two midday, I keep the pain at a level that’s quite acceptable. But I didn’t take it last night and then I woke up at 4 o’clock and thought, oh, what’s going on here.” (P23)

“I mean one of the biggest impacts is financial loss and that is not discussed full stop. That’s when you’re diagnosed with a terminal illness and there is no cure. They can slow the disease down, which they’ve successfully done in my case. But because of the side effect of loss of testosterone, so you’ve got less energy, muscle wastage and all of that. And the end resulted in me – I had to give up work. Now, that financial loss has been – made a big impact on my retirement and everything else.” (P3)

---

**Table 4**

Supportive care organising theme and super-ordinate themes

| <b>Super-ordinate theme</b> | <b>Exemplar quotes</b>                                                                                                                                                                                                                                                                                                                                                                                                                                                                                                                                                                                                                                                                                                                                                                                                                                                                                                                                                                                                                                                                                                                                                                                                                                                                                                                                                                                                                                 |
|-----------------------------|--------------------------------------------------------------------------------------------------------------------------------------------------------------------------------------------------------------------------------------------------------------------------------------------------------------------------------------------------------------------------------------------------------------------------------------------------------------------------------------------------------------------------------------------------------------------------------------------------------------------------------------------------------------------------------------------------------------------------------------------------------------------------------------------------------------------------------------------------------------------------------------------------------------------------------------------------------------------------------------------------------------------------------------------------------------------------------------------------------------------------------------------------------------------------------------------------------------------------------------------------------------------------------------------------------------------------------------------------------------------------------------------------------------------------------------------------------|
| Communication               | <p data-bbox="661 397 1919 527">“For me at my stage, or more advanced, or – I don’t know at what stage I’m at. Whether I’m advanced or reasonable, or what. I don’t have any – I don’t have any real – I don’t know what the symptoms are – if you do get advanced or more advanced, I don’t know what the symptoms are really. I have no information in that regard. I don’t know.” (P17)</p> <p data-bbox="661 560 1919 657">“He’s not exactly verbose, he doesn’t say a great deal. And I got put on Drug Z and was more or less left to my own devices with my GP who I don’t think he’d ever heard of it and it wasn’t really until about three or four months ago that we managed to sort out how the injections should be given.” (P10)</p> <p data-bbox="661 690 1919 868">“Openness, I think, for me for the treatment options. Probably the side effects were less discussed or less publicised. There was some, particularly in the radiation process, you could get burning, you could get itching, this, or that, but then later on you find out there was some others that they didn’t mention...On that score, I think there’s some minor explanation, you will get tireder, you will get hot flushes, but no advice - what can you do about a hot flush; go and have a cold shower. There’s been nothing on that, and in terms of maybe a medication, is there something will help as it does for ladies, I’ve got no idea.” (P35)</p> |
| Care Coordination           | <p data-bbox="661 901 1919 1096">“You just get the impression going through the process that the different stages of the process all have their own people, their own separate team altogether. I guess, I could sum it up in a word and that’s coordination with all the different treatments and tests and results and everything to do with the treatment, all those things are there obviously, patients are being treated for a long, long time, but having been through the process I just find that even though you end up getting through it it’s a bit of a minefield for the patient because they haven’t got a clue really what’s involved, what’s coming next, what you’ve got to do.” (P20)</p> <p data-bbox="661 1128 1919 1226">“It’s got to be the doctors. The doctors, I think, it has to start at the GP level and go right through. This is, as I say, this is your life and they’re doing the journey with you. That’s a good way of putting it, they’re doing the journey with you.” (P15)</p> <p data-bbox="661 1258 1919 1347">“I’d say ideally at time of diagnosis, after you talk to the doctor the next step would be the prostate cancer nurse. Yeah. Into the treatment part of it, yes, as part of the treatment process. But, in some ways, I think, that if you’ve got, say, sort of a trusted person, so if it’s a prostate cancer nurse providing good information and directing</p>                                |

## Supportive care needs of men with advanced prostate cancer

traffic, type of thing, and putting people in touch with resources, I think, that's probably going to help to overcome the difficulties." (P9)

"I think this support idea needs to be built in at diagnosis level into the, well, the doctors would present this as, "This is a natural part of the treatment, we're not saying go there if we think you need it, you have been diagnosed with cancer, you need it, we would strongly recommend you take your – take the benefit of going to a group for," I don't know how many meetings, but a few. And I also think that - how you do it I don't know, but that it gets presented – it is presented to men as, "This is what you do, there is no loss of dignity in going and talking over your problems with people who are in the state – in the same position as you are." (P39)

## Accessible care

"Well I'm up in the country and when I got diagnosed there was really no services in my town and it was a, you know an hour and a half trip to the closest place where could get anything done... Well they certainly – they didn't even have chemotherapy services here. And they didn't have helpers such as prostate nurses etcetera, people that were specifically trained in this sort of cancer. My oncologist, my urologists are all down in Melbourne. I mean they're two hours away in a motor car." (P34)

"It's about \$40,000 a year. I think it's about four to 12, about \$4,000 a month I think. Which the majority of people can't afford anyway. So he's got a number of other drugs, too. But that's the one he'd like to use next for me. So we've got to deal with that when we get there." (P5)

"I definitely would [go to another support group]. The problem is I can't drive anywhere at the moment because of some of the drugs I'm on; so it makes it very difficult for me to get anywhere. And now the closest group other than this one, even that one I had to go by car, but the next area's group is probably about twice the distance away and nowhere near public transport." (P27)

## Shared experience/peer support

"And I think that's – the big help that people need, and they are finding it here because they come to support group, it's looking for some comfort, I think, or some advice, or to talk to someone who's been there and done that. I think that a lot of trouble with the GPs and the surgeons, they – a lot of them don't have that first-hand experience, even though they work with it every day of their lives they don't – they haven't had the actual experience of living with the disease first-hand anyway." (P5)

"I think if you had someone or a little group of people who could meet and talk and have – maybe even in a coffee shop, have a cup of coffee, even the pub, have a beer or coffee or something and discuss your problems because that's where you'll find out that most of the people have problems the same as you. You get some men together, you can have someone facilitate it at first, then you just leave them and come back later on." (P19)

## Supportive care needs of men with advanced prostate cancer

1  
2  
3  
4  
5  
6  
7  
8  
9  
10  
11  
12  
13  
14  
15  
16  
17  
18  
19  
20  
21  
22  
23  
24  
25  
26  
27  
28  
29  
30  
31  
32  
33  
34  
35  
36  
37  
38  
39  
40  
41  
42  
43  
44  
45  
46  
47

---

“Yeah, well face-to-face is the best way, but yeah, online, why not? Particularly with people in the country, assuming they know how to go online and handle IT and all that sort of thing. Yeah, somebody or some group of people that they can contact who do have the experience and have the understanding.” (P21)

“From a personal standpoint of view, the normal sort of prostate cancer support group hasn’t been of any real benefit to myself or my wife. And the reason advanced prostate cancer for now, based in south east Queensland, which covers all of Australia and we have a monthly telephone conference and that is, yeah that’s quite beneficial. Because everybody in it has got advanced prostate cancer. It’s just that yeah, I’ve got advanced metastatic prostate cancer and that’s what this group is particular for, for men with advanced. Because we joke and say we among ourselves, “Dead Men Walking Club.” Warped sense of humour...” (P3)

“And, I know, I found going to the support group, I walked into the room, I sat by myself and I didn’t sort of mix with the other men, but that unfortunately is me. I’m not a mixer, I’m not a conversationalist, although I seem to be talking pretty well to you. So I found them, it felt a bit uncomfortable. For those who have been there a long time, they were starting to hear the same thing over and over again. So I guess that might have been why I terminated going, one of the reasons. Very well run group, I just lost, I felt I was getting no benefit out of it and I wasn’t really comfortable there. That’s me, my particular makeup you can understand.” (P6)

---

Involvement of partner/family

“She (wife) senses my feelings, my moods, and she can tell if I’m feeling a bit negative by my comments or my talk, or mostly my body language. And she doesn’t beat around the bush, she just tells me to snap out of it, or, “Pull yourself together,” or “get yourself sorted”. Why don’t you do this, or why don’t you do that?” She doesn’t muck around, she really socks it to me, which is really good, it’s what I need. And I know that a lot of men say the same thing, they are always grateful for their partners in many, many cases, and we really live a lot longer with good wives, I can assure you. My wife is definitely the pinnacle. She’s the main support there.” (P5)

“So, I get help with transport and I have someone come and help me clean once a fortnight and that, but I probably need help with shopping, but I have friends who will go and do the shopping or take me shopping. So, I’m fairly well off in that regard. ...So, yeah, it’s good to have someone who will help you, you don’t want them mothering you, but take you and if I needed shopping we would go shopping after we’d been to the gym, heavy shopping, I need it, and bring it home.” (P19)

---

1  
2  
3  
4  
5  
6  
7  
8  
9  
10  
11  
12  
13  
14  
15  
16  
17  
18  
19  
20  
21  
22  
23  
24  
25  
26  
27  
28  
29  
30  
31  
32  
33  
34  
35  
36  
37  
38  
39  
40  
41  
42  
43  
44  
45  
46  
47  
48  
49  
50  
51  
52  
53  
54  
55  
56  
57  
58  
59  
60

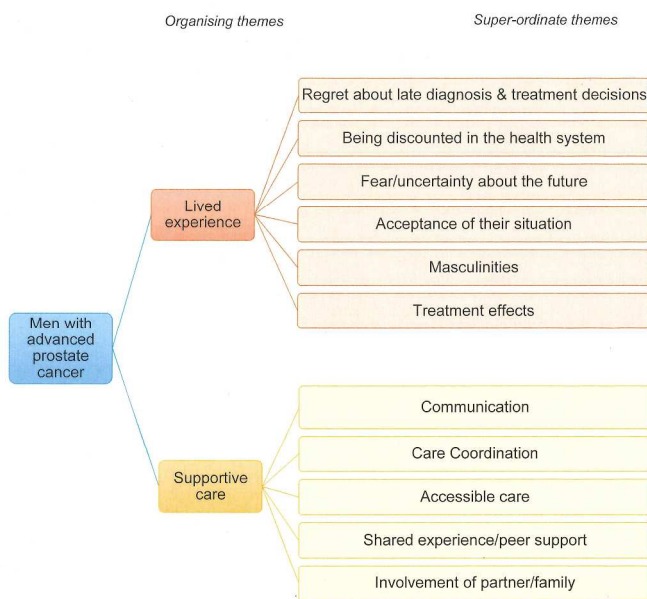

Figure 1. Coding structure derived from thematic analysis

Coding structure derived from thematic analysis

297x420mm (300 x 300 DPI)

# BMJ Open

## The experiences of Australian men diagnosed with advanced prostate cancer: a qualitative study

|                                 |                                                                                                                                                                                                                                                                                                                                                                                                                                                                                                                                                                                                               |
|---------------------------------|---------------------------------------------------------------------------------------------------------------------------------------------------------------------------------------------------------------------------------------------------------------------------------------------------------------------------------------------------------------------------------------------------------------------------------------------------------------------------------------------------------------------------------------------------------------------------------------------------------------|
| Journal:                        | <i>BMJ Open</i>                                                                                                                                                                                                                                                                                                                                                                                                                                                                                                                                                                                               |
| Manuscript ID                   | bmjopen-2017-019917.R2                                                                                                                                                                                                                                                                                                                                                                                                                                                                                                                                                                                        |
| Article Type:                   | Research                                                                                                                                                                                                                                                                                                                                                                                                                                                                                                                                                                                                      |
| Date Submitted by the Author:   | 19-Jan-2018                                                                                                                                                                                                                                                                                                                                                                                                                                                                                                                                                                                                   |
| Complete List of Authors:       | Chambers, Suzanne; Griffiths University, Menzies Health Institute Queensland<br>Hyde, Melissa; Griffith University Menzies Health Institute Queensland; Cancer Council Queensland<br>Laurie, Kirstyn; Cancer Council Queensland; Griffith University Menzies Health Institute Queensland<br>Legg, Melissa; Griffith University Menzies Health Institute Queensland; Cancer Council Queensland<br>Frydenberg, Mark; Monash Health,<br>Davis, Ian; Monash University Eastern Health Clinical School<br>Lowe, Anthony; Prostate Cancer Foundation of Australia<br>Dunn, Jeff; University of Southern Queensland, |
| <b>Primary Subject Heading</b>: | Oncology                                                                                                                                                                                                                                                                                                                                                                                                                                                                                                                                                                                                      |
| Secondary Subject Heading:      | Sociology                                                                                                                                                                                                                                                                                                                                                                                                                                                                                                                                                                                                     |
| Keywords:                       | Prostate cancer, advanced cancer, metastatic, masculinities, supportive care needs, life course                                                                                                                                                                                                                                                                                                                                                                                                                                                                                                               |
|                                 |                                                                                                                                                                                                                                                                                                                                                                                                                                                                                                                                                                                                               |

SCHOLARONE™  
Manuscripts

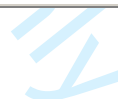

## The experiences of Australian men diagnosed with advanced prostate cancer: a qualitative study

Suzanne K. Chambers<sup>1,2,3,4,5,6</sup>, Melissa K. Hyde<sup>1,2</sup>, Kirstyn Laurie,<sup>1,2</sup> Melissa Legg<sup>1,2</sup>, Mark Frydenberg<sup>3,7,8</sup>, Ian D. Davis<sup>3,9,10</sup>, Anthony Lowe,<sup>1,3,4</sup> and Jeff Dunn<sup>1,2,3,5</sup>.

<sup>1</sup> Menzies Health Institute Queensland, Griffith University, Southport, QLD, Australia

<sup>2</sup> Cancer Research Centre, Cancer Council Queensland, Brisbane, QLD, Australia

<sup>3</sup> Australian and New Zealand Urogenital and Prostate (ANZUP) Cancer Trials Group, Sydney, NSW, Australia

<sup>4</sup> Prostate Cancer Foundation of Australia, Sydney, NSW, Australia

<sup>5</sup> Institute for Resilient Regions, University of Southern Queensland, Toowoomba, QLD, Australia

<sup>6</sup> Health & Wellness Institute, Edith Cowan University, Perth, WA, Australia

<sup>7</sup> Department of Urology, Monash Health, Melbourne, VIC, Australia

<sup>8</sup> Department of Surgery, Faculty of Medicine, Monash University, Melbourne, VIC, Australia

<sup>9</sup> Eastern Health, Melbourne, VIC, Australia

<sup>10</sup> Monash University Eastern Health Clinical School, Melbourne, VIC, Australia

### Corresponding author

Suzanne Chambers, Menzies Health Institute Queensland, Griffith University, Gold Coast Campus, QLD 4222, AUSTRALIA. E-Mail: [suzanne.chambers@griffith.edu.au](mailto:suzanne.chambers@griffith.edu.au)

### Acknowledgements

We thank Elizabeth Eldridge and Leah Zajdlewicz for research assistance. We gratefully acknowledge the men who generously gave their time for this study.

### Funding statement

This research received no specific grant from any funding agency in the public, commercial or not-for-profit sectors. IDD is supported by an NHMRC Practitioner Fellowship (APP1102604).

### Competing interests statement

The authors declare there are no competing interests to declare.

### Data sharing statement

The authors have full control of all primary data and agree to allow the journal to review their data if requested.

**Word count:** 3,997 text not incl. tables, figures or refs (recommended not exceed 4000 max **plus** up to 5 tables or figures).

**Abstract:** 180

## Supportive care needs of men with advanced prostate cancer

**Abstract**

**Objective:** To explore men's lived experience of advanced prostate cancer (PCa) and preferences for support.

**Design:** Cross-sectional qualitative study applying open-ended surveys and interviews conducted between June and November 2016. Interviews audio-recorded, and transcribed verbatim and analysed from an interpretive phenomenological perspective.

**Setting:** Australia, nation-wide.

**Participants:** 39 men diagnosed with advanced PCa (metastatic or castration-resistant biochemical regression) were surveyed with 28 men subsequently completing a semi-structured in depth telephone interview.

**Results:** Thematic analysis of interviews identified two organising themes; lived experience and supportive care. Lived experience included 6 super-ordinate themes: regret about late diagnosis and treatment decisions; being discounted in the health system; fear/uncertainty about the future; acceptance of their situation; masculinity; and treatment effects. Supportive care included 5 super-ordinate themes: communication; care coordination; accessible care; shared experience/peer support; and involvement of their partner/family.

**Conclusions:** Life course and the health and social context of prostate cancer influence men's experiences of advanced disease. Multimodal interventions integrating peer support and specialist nurses are needed that more closely articulate with men's expressed needs.

**Strengths and limitations of this study**

- Extends previous research in men with advanced PCa to describing how masculinities, life course, and the broader social and public health context influence support needs
- Robust and transparent study method and the application of a phenomenological approach
- Valid and reliable and transferable within the Australian setting
- Cross-sectional design is a study limitation

**Keywords**

Prostate cancer, advanced cancer, metastatic, masculinities, supportive care needs, life course



## Introduction

Prostate cancer (PCa) is the second most common cancer in males with the highest incidence in Australia/New Zealand and North America<sup>1</sup>. Most men present with localised disease or disease with regional lymph nodes spread with the relative 5-year survival rate for these men exceeding 95%<sup>2</sup><sup>3</sup>. However, 1 in 5 will progress to metastatic disease<sup>4</sup>. Approximately 5% of men are diagnosed with metastatic disease and the relative 5-year survival rate for these men is only 30%<sup>3,5</sup>. The mainstay treatment for advanced PCa is androgen deprivation therapy (ADT) that typically is followed by progression to metastatic castration-resistant PCa<sup>6</sup>. Once this occurs, median survival is less than 2 years<sup>7</sup>, although recent therapeutic advancements such as abiraterone acetate and enzalutamide have shown potential for further slowing disease progression<sup>8</sup> with median survival up to 3 years<sup>6</sup>. The STAMPEDE<sup>9</sup> and LATITUDE<sup>10</sup> trials demonstrated a survival advantage for the combined use of abiraterone with commencement of ADT however this was offset by earlier and more prolonged androgen suppression and a higher risk of grade 3 to 5 adverse events.

Hence, while new treatments for advanced PCa prolong life, this means men are living longer with the effects of treatment and disease progression including deteriorating bone health, pain, hot flushes, loss of libido, erectile dysfunction, increased fat mass, sarcopenia, fatigue, and cognitive decline<sup>6,11,12</sup>. Men with advanced PCa have poorer quality of life, higher levels of psychological distress, increased suicide risk, and more unmet supportive care needs compared to men with localised disease<sup>13-16</sup>. Approximately 1 in 4 experience regret about treatment decisions and this is associated with poorer quality of life and increased distress<sup>17</sup>. In sum, the burden associated with advanced PCa is substantial and further evolving as new treatments emerge.

To date there is scant psychosocial or supportive care intervention research directly targeting men with advanced PCa; and the one randomised trial of scale completed by our team failed to prove effectiveness<sup>18,19</sup>. Researchers in Canada and Scotland have previously highlighted the persisting support services gap for men with advanced PCa and suggested more qualitative research elucidating men's experiences is needed if we are to develop effective supportive care interventions<sup>20,21</sup>. Carter et al in 2011 explored the supportive care needs of men with advanced PCa and concluded that functional issues, information needs, and emotional distress were the three domains of need that

## Supportive care needs of men with advanced prostate cancer

needed to be addressed<sup>20</sup>. More recently, Paterson et al (2017) interviewed eight men with advanced PCa describing a broader range of challenges extending to interpersonal and intimacy needs<sup>21</sup>. Both studies emphasised the gap in informational support for these men, however neither deeply explored issues related to masculinities nor the broader social and public health context in which this illness experience is nested<sup>22-24</sup>. We sought to extend this previous work more specifically connecting our enquiry between men's challenges in facing advanced PCa and their preferences for support within their social context. Accordingly, we applied an interpretative phenomenological approach to describe the lived experience of men with advanced PCa (proven metastatic or castration-resistant biochemical regression) and their supportive care preferences.

## Method

### Study design

This study applied a cross-sectional qualitative design. In a first step, participants reflected on their experience with advanced PCa via a mail administered open-ended survey. These responses provided a context to inform development of a protocol to guide subsequent semi-structured in-depth telephone interviews. Consistent with the study aim to describe men's lived experiences in the context of advanced prostate cancer we adopted an interpretative phenomenological perspective<sup>25,26</sup>. Ethical approval was obtained from the Griffith University Human Research Ethics Committee (Reference number 2016/418).

### Participants and recruitment

Participants were recruited from an existing patient cohort<sup>15</sup>. In brief, this was a cohort drawn from treatment centres across Australia with participants from five Australian states. In June 2016 we contacted men who had not withdrawn from the cohort and were not to our knowledge deceased and had consented to future contact (N=141). In all, 39 men returned the survey (28% response) and of these 28 were available for telephone interview between September 2016 and November 2016 (72% response). Similar to the cohort from which participants were drawn, the mean age of participants was 72.7 years (SD=8.5; range 58.2-94.6) with the majority born in Australia (75%), married (86%), and retired (79%); men resided across four Australian states. With regards to educational level, 7 men had a college degree; 15 had a trade or technical certificate/diploma; 2 had completed senior high school

1  
2  
3 and four had completed junior high school. Mean time since diagnosis was 7.7 years (SD=5.0; range  
4 2.1-22.8). Most men were treated with ADT (88%); 73% radiation therapy; 62% prostatectomy. Men  
5 who did not participate were either too unwell (n=4), had a hearing impairment (n=1), or did not  
6 consent (n=6). Table 1 reports sociodemographic characteristics and treatment information for each  
7 interview participant.  
8  
9

### 10 11 12 **Data collection**

13  
14 Men responded to four questions in the survey about their PCa-related concerns; assistance or  
15 support accessed for these concerns and from whom; other support needed; and preferences for  
16 support for men. Thematic analysis<sup>27</sup> of responses (MH, KL, SC) indicated four areas that were  
17 challenging for men and in which they lacked support: information, medical care, side-effects, and the  
18 future. Three experienced female interviewers in a research fellow or research assistant position with  
19 post-graduate training in the behavioural sciences (ML, KL, EE) conducted telephone interviews to  
20 further explore the key areas identified. Interviews were on average 62.1 minutes in length (SD=19.2;  
21 range=29.2 to 111.9 minutes). Member checking occurred at the beginning of each interview during  
22 which the interviewer asked participants to comment on the accuracy of researcher interpretation of  
23 survey results and gave participants the opportunity to add anything they thought had been missed.  
24 Interview questions (Table 2) explored in greater depth the concerns previously identified in men's  
25 survey responses: health system concerns, supportive care needs, barriers to support and preferred  
26 approaches. Participants were invited to discuss other aspects of their experience that they considered  
27 were important. Interviews were audio-recorded and transcribed verbatim.  
28  
29  
30  
31  
32  
33  
34  
35  
36  
37  
38  
39  
40  
41

### 42 **Data analysis**

43  
44 Interview transcripts were analysed using thematic analysis<sup>27,28</sup>. Themes were derived  
45 inductively from the data by reading and re-reading the interview narratives and from this developing  
46 an understanding of men's lived experience through their words. Coders had social and behavioural  
47 science (SC, MH, JD, KL), and nursing (SC) backgrounds with a wide range of experience from two  
48 to 20 years working in psycho-oncology and prostate cancer research and included male and female  
49 researchers. Transcripts were coded iteratively with constant comparison between the codes generated  
50 and the data to ensure that consistent and diverging responses were incorporated. Two research team  
51  
52  
53  
54  
55  
56  
57  
58  
59  
60

## Supportive care needs of men with advanced prostate cancer

1  
2  
3 members independently coded one-third of the transcripts and generated a preliminary coding scheme  
4 (MH, KL). This coding scheme was further refined with a third (SC) and fourth (JD) research team  
5 member. Once all interview transcripts were included the coding scheme was further reviewed and  
6 agreed upon by all coders. Exemplar responses were identified across transcripts to illustrate and  
7 confirm labelling of themes. Reporting of data is consistent with consolidated criteria for reporting  
8 qualitative studies (COREQ) guidelines<sup>29</sup>.  
9  
10  
11  
12  
13

## 14 Results

15  
16 Thematic analysis identified two organising themes: lived experience and supportive care.  
17 The first organising theme reflected men's lived experience with advanced PCa, and within this six  
18 super-ordinate themes. The second organising theme captured elements of supportive care that men  
19 found challenging and their preferences for how care should be delivered with five super-ordinate  
20 themes. Figure 1 depicts the coding structure. Tables 3 and 4 present illustrative quotes for each  
21 super-ordinate theme.  
22  
23  
24  
25  
26  
27

### 28 Lived experience

29  
30 Men's lived experience with advanced PCa included six super-ordinate themes: regret about  
31 late diagnosis and treatment decisions; being discounted in the health system; fear/uncertainty about  
32 the future; acceptance of their situation; masculinity; and treatment effects (Table 3).  
33  
34  
35

#### 36 *Regret about late diagnosis and treatment decisions*

37  
38 Most men described feeling regret about late diagnosis or treatment and this was commonly  
39 attributed to delays by clinicians. Many men perceived these delays were caused by general  
40 practitioners and/or specialists who would not perform digital rectal examinations (DREs) or prostate-  
41 specific antigen (PSA) testing; did not detect PCa until it was well advanced despite regular testing;  
42 and did not refer patients for further treatment or testing in a timely manner despite men's requests for  
43 them to do so. From this, some men were left with a distrust of the medical profession. Many men  
44 also discussed regretting their treatment choices and not having had a second opinion so that they felt  
45 more adequately informed and clearly understood the outcomes of treatment, including side effects,  
46 and how these could be managed.  
47  
48  
49  
50  
51  
52  
53  
54  
55

#### 56 *Being discounted in the health system*

## Supportive care needs of men with advanced prostate cancer

1  
2  
3 In their interactions with clinicians, most men described their concerns, needs and autonomy  
4 as discounted or ignored. Many men felt devalued and believed they were somehow less important in  
5 the broader health system. In their experience, PCa was the ‘poor cousin’ of breast cancer in terms of  
6 funding, research focus, and controversy over the value of PSA testing; and less effort by the  
7 government and non-profits to promote awareness of PCa. Some men also considered that they and  
8 their cancer were less important due to their older age and community attitudes where PCa is  
9 considered a cancer that may not lead to death.

***Fear/uncertainty about the future***

10  
11 An uncertain future was discussed in terms of most men needing to make ‘the unknowable’ a  
12 known entity by understanding how much time they may have left to live; what lies ahead for disease  
13 progression and quality of life; potential treatment options; and next steps for support when all  
14 treatment options had been exhausted. This information was critical to their ability to feel more in  
15 control and to prepare for the future both psychologically and practically while they were well enough  
16 to do so. By contrast, some men discussed not wanting to know what the future held in order to focus  
17 on their day-to-day life.

***Acceptance***

18  
19 Many men used their age as a frame to accept physical changes and the threat to their  
20 mortality. Other approaches adopted by many men to reach acceptance were focusing on ‘getting on  
21 with it’, and viewing ongoing physical effects of the disease or its treatment as part of life, an  
22 inevitable outcome of treatment or disease progression, and as a favourable alternative to death.  
23 Regarding sexuality, some men found changes in their physical capacity to have sex an ongoing cause  
24 of distress. Other men shifted their focus to other aspects of their relationships (e.g., expressing  
25 intimacy in ways that do not require an erection) as a way to accept their situation.

***Masculinities***

26  
27 Male values and masculinities were discussed as central to most men’s experience of PCa,  
28 support, and coping. Many men believed that as a group they do not look after themselves, go to the  
29 doctor, ask for help, or talk about their problems by comparison to women, and have a different view  
30 on their health, are less prepared to discuss their health, and gave health less attention. This reluctance

## Supportive care needs of men with advanced prostate cancer

1  
2  
3 to seek help or support or talk about their problems was ascribed to male values around being strong,  
4 capable, independent/autonomous, or stoic. Many men used avoidance as a coping approach by  
5 avoiding thinking or talking about their situation, and covering up or ignoring side-effects or a need  
6 for support. Some men expressed concerns that there would be negative consequences socially or in  
7 their employment if others knew about their cancer. Privacy and being embarrassed talking about  
8 personal issues were also raised by many men. Viewing sexuality and sexual function as important to  
9 their identity as a man meant that some men were deeply troubled by changes in sexuality; and  
10 believed that their relationship with their partner now would be negatively impacted or that it would  
11 no longer be possible for them to start new relationships with women.

12  
13  
14  
15  
16  
17  
18  
19  
20  
21 In their perceived role as ‘the provider’ and ‘the protector’, some men expected to give help  
22 rather than receive it. Some men tried to protect their wives or their family by not talking about their  
23 problems and thus avoid worrying them. Many also adopted approaches to promote adjustment  
24 including being optimistic and ‘getting on with it’; taking responsibility for their health and well-  
25 being (e.g., remaining physically active); as well as an action-oriented approaches in which they  
26 identified and solved problems directly or sought help or support. In using these approaches, men  
27 saw themselves not constrained by masculine norms constraining help seeking. Many men devalued  
28 ‘talk’ as a way to obtain support and viewed psychologists as not able to provide the solutions they  
29 needed, also describing unfavourable attitudes towards support groups as an opportunity for self-pity  
30 or drama.

### 40 *Treatment effects*

41  
42 All men discussed the effects of advanced PCa and its treatment that affected their quality of  
43 life, relationships, capacity to do daily tasks, and for many men were highly distressing. Prominent  
44 amongst these were physical effects and financial concerns. Physical effects included the inability to  
45 obtain an erection; lack of libido; urinary incontinence; changes in appearance and bodily structure  
46 including gynecomastia; weight gain; sarcopenia; decreased bone density; fatigue; dizziness; loss of  
47 balance; breathlessness; hot flushes; cognitive changes; and pain. Some men discussed no longer  
48 being well enough to work and that this negatively affected their income and retirement plans.

### 56 **Supportive care**

1  
2  
3 The organising theme supportive care included five super-ordinate themes: communication;  
4 care coordination; accessible care; shared experience/peer support; and involvement of their  
5 partner/family (Table 4).  
6  
7

### 8 ***Communication***

9  
10 Men had mixed experiences in their interactions and communication with health  
11 professionals. Four pivotal points in the care trajectory in which effective communication appeared  
12 most critical were: diagnosis; deciding on treatment options; treatment effects and symptom  
13 management; follow-up care. Many men described being unclear about the specifics of their  
14 diagnosis (e.g., staging, PSA) whereas, by contrast, some men appreciated the direct and honest  
15 approach adopted by their clinicians when communicating about the severity of their disease. When  
16 discussing treatment options, men desired more guidance and support in making a treatment decision;  
17 and for options to be more clearly communicated so that they could better understand long-term  
18 treatment effects. Some men were dismayed that their GPs or other health professionals did not seem  
19 to have specialised knowledge about PCa. Preferred decision support included clear, unbiased  
20 communication about the pros and cons of each treatment option and referral to other sources of  
21 information that men could consider in their own time.  
22  
23  
24  
25  
26  
27  
28  
29  
30  
31  
32  
33

34 Some men described confusion and frustration when they were given a treatment that they  
35 needed to self-administer (e.g., injections) but were not effectively instructed in how to do this. Men  
36 commonly discussed health professionals' communication about treatment side-effects as insufficient  
37 (e.g., told about effects but not how to deal with them) and selective (e.g., told about immediate but  
38 not long-term effects), and as a consequence felt unprepared and isolated in their experience. Some  
39 men described not being listened to when they raised their concerns or being unable to get clear  
40 answers to questions. Some men expressed that it was up to them to find solutions to manage their  
41 side-effects because clinicians did not adequately address these.  
42  
43  
44  
45  
46  
47  
48  
49

### 50 ***Care Coordination.***

51  
52 For some men, regular ongoing communication with their clinicians was a source of support,  
53 however other men felt out of touch and isolated due to the length of time between each consultation.  
54 GPs were important to some men in helping them feel connected with their care team. Most men  
55  
56  
57  
58  
59  
60



## Supportive care needs of men with advanced prostate cancer

1  
2  
3 discussed the need for better coordinated care and information and this was focused on three aspects:  
4 communication between health professionals; having a 'middle man'; and integrating psychosocial  
5 support as part of routine care.  
6  
7

8  
9 A lack of communication between specialist clinicians regarding treatment and referral was  
10 discussed by many men as problematic. Men had mixed views as to who should be the central point  
11 of call for information and referral. Some men believed this should be their GP; others suggested their  
12 urologist or oncologist. Patient advocates or navigators were also discussed by some men as an  
13 option to help streamline and clarify the diagnostic and treatment process. Some men discussed PCa  
14 nurses as being central to their care. Nurses provided informational, emotional, and practical support  
15 that clarified men's understanding of their situation; served as an intermediary between the patient or  
16 couple and other clinicians; and were seen as more likely to refer them to other beneficial services  
17 than other health care professionals. These men discussed that the best time to be connected with a  
18 PCa nurse was at diagnosis with continued access throughout treatment.  
19  
20  
21  
22  
23  
24  
25  
26  
27

28  
29 Some men identified the need to integrate psychosocial support as part of routine care without  
30 relying on men themselves to raise emotional issues with clinicians. Alongside this, some men also  
31 discussed the need for routine referral to support groups or information about the existence of local  
32 groups; and exercise programs as helpful for weight gain and muscle wastage and managing feelings  
33 of loss of masculinity.  
34  
35  
36  
37

***Accessible care***

38  
39  
40 Many men discussed three main barriers to accessible care: geographic location; ill health and  
41 financial cost of treatment. Some men experienced difficulty accessing services because they resided  
42 in a regional or rural location where services were either not available or required them to travel long  
43 distances with resultant cost and inconvenience. Some men had difficulty or were prevented from  
44 accessing central or nearby services due to ill health or fatigue; and some men discussed the high  
45 financial cost of treatments or drugs to manage side-effects such as erectile dysfunction and  
46 uncertainty about how to cover these costs. To overcome accessibility issues, these men suggested  
47 use of online or telephone services for those in rural or regional areas or who could not access care  
48  
49  
50  
51  
52  
53  
54  
55  
56  
57  
58  
59  
60



## Supportive care needs of men with advanced prostate cancer

1  
2  
3 due to ill health; lobbying the government to subsidise financial costs of treatment; and increasing the  
4  
5 availability of home-based medical care or practical assistance services.

***Shared experience/peer support***

6  
7  
8 The opportunity to talk to other men in the same situation was discussed by most men as a  
9  
10 source of support that they had or wished they had an awareness of and access to. Three aspects of  
11  
12 shared experience/peer support: benefits; delivery preferences; and barriers were described. Shared  
13  
14 experience was highly valued by most men because it allowed them to talk to someone who had been  
15  
16 through the same experience; obtain information or advice when weighing up treatment decisions or  
17  
18 managing side effects; make positive upward (e.g., other men doing well and inspiring hope for  
19  
20 recovery) or downward (e.g., other men are doing worse so I am ok) comparisons<sup>30</sup>; gave men a safe  
21  
22 and confidential forum to express their concerns; and helped men to feel less alone. However, some  
23  
24 men did not always describe the concept of shared mutual experience as peer support or being  
25  
26 connected to support groups. Rather, mutual support also occurred through companionship with other  
27  
28 men who did not have cancer such as at Men's Sheds and social or sporting clubs.

29  
30 Most men proposed different delivery methods for peer support (e.g., face-to-face, telephone,  
31  
32 or online) to take into account individual differences and need for privacy or anonymity. Both  
33  
34 structured (e.g., with a facilitator and an agenda) and unstructured (e.g., a chat over coffee) methods  
35  
36 were acceptable. Some men preferred shared experiences specifically for men with advanced disease  
37  
38 on the basis that men with localised disease have different treatments and cancer-related physical  
39  
40 effects.

41  
42 Finally, despite acknowledging the benefits of shared experience, many men also discussed  
43  
44 barriers to peer support use. These included feeling uncomfortable to share in a group; the difficulty  
45  
46 of sustaining support groups; death of peers; and the belief that support groups were focused only on  
47  
48 emotional or psychological information.

***Involvement of partner/family***

49  
50  
51 In addition to shared experience, most men identified partners and/or family and friends as  
52  
53 sources of support that contributed to their emotional and physical wellbeing. For most men, female  
54  
55 partners were their main source of emotional and practical support. Many men discussed that partners  
56  
57

## Supportive care needs of men with advanced prostate cancer

1  
2  
3 were impacted by the diagnosis and treatment of PCa and believed it was important to involve and  
4 support partners in their care. Some men commented that partners are often the catalyst for their  
5 involvement in support groups or seeking out information/ support from other sources. Broader  
6 family and friends were also discussed by some men as sources of support, often providing practical  
7 assistance.  
8  
9  
10  
11

### 12 Discussion

13  
14 The present study extends previous research about the experience of men with advanced PCa,  
15 adding an additional level of description that provides insight into how health context influences  
16 men's responses; the influence of life course; and ways in which masculinities is expressed in this  
17 setting. As in previous research, difficulties with accessible informational support about the disease  
18 and its treatment were highly evident<sup>20 21 31</sup>. That these problems persist and are remarkably similar  
19 in Canada<sup>20</sup>, Scotland<sup>21</sup>, and in our Australian data, is striking and suggests that globally there may  
20 be a gap in health systems' responses to advanced PCa. PCa survivorship research has to date been  
21 underfunded by comparison to breast cancer<sup>32</sup>; a consensus about clinical care for advanced PCa is  
22 just now emerging<sup>33</sup>; and the historical and persistent debate about the early detection of prostate  
23 cancer<sup>24 34</sup> are likely contributors to this. The men's reports in our study of PCa having a less  
24 favourable public profile reflect this and show how the broader public health and social context can  
25 have a profound negative impact on an already difficult cancer experience.  
26  
27  
28  
29  
30  
31  
32  
33  
34  
35  
36  
37

38 The influence of life course in response to illness in terms of men's age and the expression of  
39 masculinities and masculine models of coping strongly emerged in this study and this has implications  
40 for the design of care models<sup>35</sup>. We propose that there is a need to newly conceptualise and then  
41 deliver what men actually want, rather than starting from a first principle of revising services already  
42 provided that are not meeting men's needs. Men underutilise psychosocial support services after  
43 cancer compared to women with breast cancer<sup>36</sup>; and previous research has suggested that  
44 interventions promoting self-management in men with chronic diseases should include action oriented  
45 approaches if they are to be utilised<sup>37 38</sup>. With regards to providers of support, men in the present  
46 study proposed both peer support and nurse specialists as preferred care providers, confirming  
47 previous research<sup>39</sup>.  
48  
49  
50  
51  
52  
53  
54  
55  
56  
57  
58  
59  
60

1  
2  
3 Limitations of this study include the cross sectional design. Recent qualitative research  
4 applying a prospective study design proposed that coping with advanced cancer evolves over time as  
5 symptoms progress and fluctuate<sup>40</sup>. Future research utilising a prospective case study design will add  
6 further depth to our understanding of men's experiences in the face of advancing PCa. As well, the  
7 men in our study were not newly diagnosed with advanced disease and so reports of their experience  
8 at the time of diagnosis or initial disease progression are retrospective and subject to recall bias.  
9  
10 Strengths include a robust and transparent study method and the involvement of men **across four**  
11 Australian states with varied sociodemographic backgrounds such that our data can be considered  
12 broadly relevant across the Australian setting. We do note that our participant group was not  
13 ethnically diverse and so likely does not represent these experiences, that have been well described  
14 elsewhere<sup>41</sup>.

15  
16  
17  
18  
19  
20  
21  
22  
23  
24 Based on our previous research<sup>18 42</sup> and the present results we propose five key content  
25 elements for inclusion in supportive care interventions with men with advanced PCa: decision  
26 support; treatment education with self-management and skills training for symptoms, including  
27 exercise prescription; routine screening for psychological distress with referral; psycho-education  
28 with tailored distress management strategies; communicating with health professionals. Strategies to  
29 integrate peer support within the care team are needed. Finally, the prostate cancer specialist role  
30 presents as highly acceptable to men and is ideally placed for supportive care delivery and care  
31 coordination<sup>43</sup>.

32  
33  
34  
35  
36  
37  
38  
39  
40 In conclusion, supportive care services for men with advanced PCa need to be multimodal  
41 and take into account the influence of life course on men's illness experience. There is a need for the  
42 health system to prioritise research and development in clinical PCa care taking a more holistic  
43 approach than currently exists.  
44  
45  
46  
47  
48  
49

#### 50 **Author contributions**

51 SC, JD and MH conceived the study, developed the interview protocol, undertook the analyses and  
52 interpretation, and led manuscript development. KL recruited and interviewed participants, undertook  
53 analysis and contributed to writing the manuscript. ML recruited and interviewed participants. MF, ID  
54 and AL contributed to data interpretation. All authors contributed to revisions and approved the final  
55 manuscript.  
56  
57  
58  
59  
60

## References

1. Ferlay J, Soerjomataram I, Ervik M, et al. GLOBOCAN 2012 v1. 0, Cancer Incidence and Mortality Worldwide: IARC CancerBase No. 11. Lyon, France: International Agency for Research on Cancer; 2013 [Available from: [globocan.iarc.fr/Default.aspx](http://globocan.iarc.fr/Default.aspx) accessed 8th April 2017].
2. Australian Institute of Health and Welfare. Cancer in Australia 2017. Cancer series no. 101. Cat. No. CAN 100. Canberra, Australia: AIHW 2017.
3. National Cancer Institute. SEER Cancer Stat Facts: Prostate Cancer Bethesda, MD: National Cancer Institute; 2016 [Available from: <http://seer.cancer.gov/statfacts/html/prost.html> accessed 8th April 2017].
4. Luo Q, Yu XQ, Smith DP, et al. A population-based study of progression to metastatic prostate cancer in Australia. *Cancer Epidemiology* 2015;39(4):617-22. doi: 10.1016/j.canep.2015.04.013
5. American Cancer Society. Cancer Facts & Figures 2017. Atlanta,GA: American Cancer Society, 2017.
6. Crawford ED, Petrylak D, Sartor O. Navigating the evolving therapeutic landscape in advanced prostate cancer. *Urologic Oncology: Seminars and Original Investigations* 2017;35:S1-S13. doi: 10.1016/j.urolonc.2017.01.020
7. Heidenreich A, Bastian PJ, Bellmunt J, et al. Guidelines on prostate cancer. 2012: European Association of Urology., 2012.
8. Afshar M, Evison F, James ND, et al. Shifting paradigms in the estimation of survival for castration-resistant prostate cancer: A tertiary academic center experience. *Urologic Oncology: Seminars and Original Investigations* 2015;33(8):338-e1. doi: 10.1016/j.urolonc.2015.05.003
9. James ND, de Bono JS, Spears MR, et al. Abiraterone for prostate cancer not previously treated with hormone therapy. *New England Journal of Medicine* 2017;377:338-51. doi: 10.1056/NEJMoa1702900
10. Fizazi K, Tran N, Fein L, et al. Abiraterone plus prednisone in metastatic, castration-sensitive prostate cancer. *New England Journal of Medicine* 2017;377:352-60. doi: 10.1056/NEJMoa1704174
11. Gilbert DC, Duong T, Kynaston HG, et al. Quality - of - life outcomes from the Prostate Adenocarcinoma: TransCutaneous Hormones (PATCH) trial evaluating luteinising hormone - releasing hormone agonists versus transdermal oestradiol for androgen suppression in advanced prostate cancer. *BJU International* 2017;119(5):667-75. doi: 10.1111/bju.13687
12. Resnick MJ, Penson DF. Quality of Life with Advanced Metastatic Prostate Cancer. *Urologic Clinics of North America* 2012;39(4):505-15. doi: <https://doi.org/10.1016/j.ucl.2012.07.007>
13. Bill-Axelsson A, Garmo H, Lambe M, et al. Suicide risk in men with prostate-specific antigen-detected early prostate cancer: a nationwide population-based cohort study from PCBaSe Sweden. *European Urology* 2010;57(3):390-95.
14. Bloch S, Love A, Macvean M, et al. Psychological adjustment of men with prostate cancer: a review of the literature. *BioPsychoSocial Medicine* 2007;1(1):2.
15. Chambers SK, Occhipinti S, Foley E, et al. Mindfulness-based cognitive therapy in advanced prostate cancer: a randomized controlled trial. *Journal of Clinical Oncology* 2016;35(3):291-97. doi: 10.1200/JCO.2016.68.8788
16. Eton DT, Lepore SJ. Prostate cancer and health - related quality of life: a review of the literature. *Psycho - Oncology* 2002;11(4):307-26.
17. Clark JA, Wray NP, Ashton CM. Living with treatment decisions: regrets and quality of life among men treated for metastatic prostate cancer. *J Clin Onc* 2001;19(1):72-80.
18. Chambers S, Hyde M, Smith D, et al. A Systematic Review of Psychological Interventions for Prostate Cancer Survivors and Their Partners: Clinical and Research Implications. *Psycho-Onc* 2017;26(7):873-913. doi: 10.1002/pon.4431

19. Chambers SK, Occhipinti S, Foley E, et al. Mindfulness-Based Cognitive Therapy in Advanced Prostate Cancer: A Randomized Controlled Trial. *J Clin Onc* 2017;35(3):291-97. doi: doi:10.1200/JCO.2016.68.8788
20. Carter N, Bryant-Lukosius D, DiCenso A, et al. The supportive care needs of men with advanced prostate cancer. *Oncol Nurs Forum* 2011;38(2):189-98. doi: 10.1188/11.ONF.189-198
21. Paterson C, Kata RSG. Unmet Supportive Care Needs of Men With Locally Advanced and Metastatic Prostate Cancer on Hormonal Treatment. 2017 doi: 10.1097/NCC.0000000000000482.
22. Chambers S, Hyde M, Zajdlewicz L, et al. Measuring Masculinity in the Context of Chronic Disease. *Psychology of Men & Masculinity* 2015;17(3):228-42. doi: 10.1037/men0000018
23. Chambers SK, Chung E, Wittert G, et al. Erectile dysfunction, masculinity, and psychosocial outcomes: a review of the experiences of men after prostate cancer treatment. *Translational Andrology and Urology* 2017;6(1):60-68. doi: 10.21037/tau.2016.08.12
24. Dunn J, Casey C, Sandoe D, et al. Advocacy, support and survivorship in prostate cancer. *Eur J Cancer Care* 2017:e12644-n/a. doi: 10.1111/ecc.12644
25. Davidsen AS. Phenomenological Approaches in Psychology and Health Sciences. *Qualitative Research in Psychology* 2013;10(3):318-39. doi: 10.1080/14780887.2011.608466
26. Lopez KA, Willis DG. Descriptive Versus Interpretive Phenomenology: Their Contributions to Nursing Knowledge. *Qualitative Health Research* 2004;14(5):726-35. doi: 10.1177/1049732304263638
27. Braun V, Clarke V. Using thematic analysis in psychology. *Qualitative research in psychology* 2006;3(2):77-101. doi: 10.1191/1478088706qp063oa
28. Wojnar DM, Swanson KM. Phenomenology: An Exploration. *Journal of Holistic Nursing* 2007;25(3):172-80. doi: 10.1177/0898010106295172
29. Tong A, Sainsbury P, Craig J. Consolidated criteria for reporting qualitative research (COREQ): a 32-item checklist for interviews and focus groups. *International Journal for Quality in Health Care* 2007;19(6):349-57.
30. Wood JV. Theory and research concerning social comparisons of personal attributes. *Psychological Bulletin* 1989;106(2):231-48. doi: 10.1037/0033-2909.106.2.231
31. Jenkins V, Fallowfield L, Jenkins VA, et al. No man's land: information needs and resources of men with metastatic castrate resistant prostate cancer. *Support Care Cancer* 2016;24(11):4471-73. doi: 10.1007/s00520-016-3358-0
32. AIHW. Cancer in Australia 2010: an overview. In: Australian Institute of Health and Welfare, ed. Canberra: Australian Institute of Health and Welfare, 2010.
33. Gillessen S, Attard G, Beer TM, et al. Management of Patients with Advanced Prostate Cancer: The Report of the Advanced Prostate Cancer Consensus Conference APCCC 2017. *European Urology* 2017 doi: 10.1016/j.eururo.2017.06.002
34. Lepor H. Opinion Makers: Revisiting the USPSTF Decision on PSA Tests - Urologist Herbert Lepor, MD, sets forth 'sensible solution' *Medpage Today* 2016.
35. Evans J, Frank B, Oliffe JL, et al. Health, Illness, Men and Masculinities (HIMM): a theoretical framework for understanding men and their health. *Journal of Men's Health* 2011;8(1):7-15. doi: 10.1016/j.jomh.2010.09.227
36. Forsythe LP, Kent EE, Weaver KE, et al. Receipt of psychosocial care among cancer survivors in the United States. *J Clin Onc* 2013;31(16):1961-9. doi: 10.1200/jco.2012.46.2101
37. Galdas PM, Cheater F, Marshall P. Men and health help-seeking behaviour: literature review. *J Adv Nurs* 2005;49(6):616-23. doi: 10.1111/j.1365-2648.2004.03331.x
38. Roesch SC, Adams L, Hines A, et al. Coping with prostate cancer: a meta-analytic review. *Journal of Behavioral Medicine* 2005;28(3):281-93.
39. King AJL, Evans M, Moore THM, et al. Prostate cancer and supportive care: a systematic review and qualitative synthesis of men's experiences and unmet needs. *Eur J Cancer Care* 2015;24(5):618-34. doi: 10.1111/ecc.12286
40. Roberts D, Calman L, Large P, et al. A revised model for coping with advanced cancer. Mapping concepts from a longitudinal qualitative study of patients and carers coping with advanced cancer onto Folkman and Greer's theoretical model of appraisal and coping. *Psycho-Onc*:n/a-n/a. doi: 10.1002/pon.4497

## Supportive care needs of men with advanced prostate cancer

- 1  
2  
3 41. Rivas C, Matheson L, Nayoan J, et al. Ethnicity and the prostate cancer experience: a qualitative  
4 metanalysis. *Psycho-Onc* 2016;25(10):1147-56. doi: 10.1002/pon.4222  
5 42. Zopf EM, Newton RU, Taaffe DR, et al. Associations between aerobic exercise levels and  
6 physical and mental health outcomes in men with bone metastatic prostate cancer: a cross-  
7 sectional investigation. *Eur J Cancer Care* 2016:n/a-n/a. doi: 10.1111/ecc.12575  
8 43. Carter N, Miller PA, Murphy BR, et al. Healthcare providers' perspectives of the supportive care  
9 needs of men with advanced prostate cancer. *Oncol Nurs Forum*, 2014:421+.

**Figure Legend**

10  
11  
12  
13  
14 Figure 1. Coding structure derived from thematic analysis  
15  
16  
17  
18  
19  
20  
21  
22  
23  
24  
25  
26  
27  
28  
29  
30  
31  
32  
33  
34  
35  
36  
37  
38  
39  
40  
41  
42  
43  
44  
45  
46  
47  
48  
49  
50  
51  
52  
53  
54  
55  
56  
57  
58  
59  
60

**Table 1**

Sociodemographic characteristics and treatment information for participants completing an open-ended survey and telephone interview

| Participant ID | Age (years) | Time since diagnosis (years) | Received hormone treatment (Y/N/NR) |
|----------------|-------------|------------------------------|-------------------------------------|
| P3             | 70          | 8.0                          | Y                                   |
| P5             | 67          | NR                           | NR                                  |
| P6             | 90          | 4.2                          | Y                                   |
| P7             | 69          | 4.3                          | Y                                   |
| P8             | 69          | 7.0                          | Y                                   |
| P9             | 69          | 3.9                          | Y                                   |
| P10            | 86          | 3.2                          | Y                                   |
| P12            | 72          | 14.4                         | Y                                   |
| P14            | 67          | 4.0                          | Y                                   |
| P15            | 71          | 11.5                         | Y                                   |
| P17            | 95          | 10.3                         | Y                                   |
| P18            | 75          | 16.0                         | Y                                   |
| P19            | 78          | 5.4                          | Y                                   |
| P20            | 69          | 5.8                          | Y                                   |
| P21            | 70          | 15.1                         | Y                                   |
| P23            | 79          | 12.0                         | Y                                   |
| P24            | 72          | 22.8                         | Y                                   |
| P25            | 61          | 2.7                          | Y                                   |
| P26            | 76          | 7.8                          | Y                                   |
| P27            | 64          | 8.1                          | N                                   |
| P30            | 58          | 6.0                          | Y                                   |
| P31            | 59          | 4.8                          | N                                   |
| P32            | 70          | 4.2                          | Y                                   |
| P33            | 74          | 6.8                          | Y                                   |
| P34            | 70          | 6.0                          | N                                   |
| P35            | 78          | 4.4                          | Y                                   |
| P38            | 76          | NR                           | NR                                  |
| P39            | 83          | 2.1                          | Y                                   |

N = No; NR = Not reported; Y = Yes.



## Supportive care needs of men with advanced prostate cancer

**Table 2**

Interview questions

| Focus area            | Question                                                                                                                                                                                                                                                       |
|-----------------------|----------------------------------------------------------------------------------------------------------------------------------------------------------------------------------------------------------------------------------------------------------------|
| Health system         | Thinking about your medical treatment, what changes do you feel would make medical services better meet the needs of men with advanced prostate cancer?                                                                                                        |
| Supportive Care Needs | Thinking about the treatment side effects that a man with advanced prostate cancer might experience, what sort of support would help most?                                                                                                                     |
|                       | Thinking about the future and the worries that face a man with prostate cancer that has advanced or recurred, what sort of support would help most?                                                                                                            |
| Barriers              | In developing services to help men cope or manage better with advanced prostate cancer, can you describe support approaches or ways of helping that would <b>not</b> be acceptable to men? For example, supportive approaches that would turn men off or away? |
| Preferred approaches  | In developing services to help men cope or manage better with advanced prostate cancer, can you describe support approaches or ways of helping that would be more attractive to men?                                                                           |
| Other                 | Thinking about what we have spoken about today, is there anything else we haven't covered that you think is important to supporting men with advanced prostate cancer?                                                                                         |



**Table 3**

Lived experience organising theme and super-ordinate themes

| Super-ordinate theme                                | Exemplar quotes                                                                                                                                                                                                                                                                                                                                                                                                                                                                                                                                                                                                                                                                                                                                                                                                                                                                                                                                                                                                                                                                                                                                                                                                                                                                                                                                                                                                                                              |
|-----------------------------------------------------|--------------------------------------------------------------------------------------------------------------------------------------------------------------------------------------------------------------------------------------------------------------------------------------------------------------------------------------------------------------------------------------------------------------------------------------------------------------------------------------------------------------------------------------------------------------------------------------------------------------------------------------------------------------------------------------------------------------------------------------------------------------------------------------------------------------------------------------------------------------------------------------------------------------------------------------------------------------------------------------------------------------------------------------------------------------------------------------------------------------------------------------------------------------------------------------------------------------------------------------------------------------------------------------------------------------------------------------------------------------------------------------------------------------------------------------------------------------|
| Regret about late diagnosis and treatment decisions | <p data-bbox="667 402 1906 591">“I saw a GP and first of all, I think it was 1.9 was my PSA reading, and when it got to 14 I said to him – everything I read tells me that I should be seeing a specialist. And he said, “Oh you worrywart, don’t worry about it,” and then next time I said it, he said, “All right I’ll send you to see [...] he’s a urologist.” I went to see his specialist mate, and he said, “Bloody hell, where’ve you been, you should’ve been here three years ago.” Because it’d been like that for three or four years. The prostate was full of cancer, and it escaped outside the prostate and went into my lymph nodes, because of all that time wasted.” (P31)</p> <p data-bbox="667 597 1906 678">“My only regret was that I didn’t get enough information at the beginning, or, hey, maybe I did, but I was never comfortable with the fact that I had really learnt everything that there was to learn about it before I actually made decisions, and I may or may not have made the wrong one.” (P32)</p>                                                                                                                                                                                                                                                                                                                                                                                                                 |
| Being discounted in the health system               | <p data-bbox="667 688 1906 841">“The men seemed to think that prostate cancer was a B grade compared to other cancers. Because it was older men, and they’d had their run probably. No-one’s going to worry too much about it... Usually men who have got prostate cancer are old, older men and certainly you wouldn’t all the funding going to the old men and not the young women, or middle-aged women. It wouldn’t be fair would it. So we thought that the prostate cancer people were sort of the poor relations in both attitude, funding, in a lot of ways. But you can’t change it.” (P26)</p> <p data-bbox="667 847 1906 906">“They treat you more as a joke, yeah, and the last time I spoke to him about it– I tried to find out am I going to have a lot of pain, is my bones going to break or whatever? He said: You’ll probably die of pneumonia.”(P6)</p> <p data-bbox="667 912 1906 1062">“I just got the impression that the patient was just a number, the name didn’t matter, in fact, we won’t even involve the patient in the discussion, they’re there but we’ve just got a number for him on the records and when they come around to your bed the team, which could be a half a dozen or 10 or even more depending on how many people they’ve got on the day, they just start talking about the condition you’ve got, absolutely nothing, no mention of you yourself being the patient, they don’t even recognise you.” (P20)</p> |
| Fear/uncertainty about the future                   | <p data-bbox="667 1071 1906 1346">“I’d just like to know where I’m headed. I guess he can’t tell me what’s going to happen with the disease, but I’d imagine there must be a pattern, a reasonable pattern of what happens. I mean, with some illnesses you know this is going to progress from this to that, to that, but an article I saw recently in a support group pamphlet was, if you took Drug X tablets, when they stopped working, you took Drug Y tablets. When they stopped working, the next thing on the - on the ladder was death, d-e-a-t-h. Well, I’ve been taking Drug X for quite a while. I’ve been taking Drug Y for quite a while. Each had a definite effect on my PSA, each lost that effect. So really, the next thing that faces me is death. Now, so, it was four months ago that my oncologist gave me, he said, “You’ll see your birthday.” Well, that’s only three months away, it’s only two months away actually. What’s going to happen between now and then?” (P6)</p>                                                                                                                                                                                                                                                                                                                                                                                                                                                     |

Supportive care needs of men with advanced prostate cancer

For peer review only

1  
2  
3  
4  
5  
6  
7  
8  
9  
10  
11  
12  
13  
14  
15  
16  
17  
18  
19  
20  
21  
22  
23  
24  
25  
26  
27  
28  
29  
30  
31  
32  
33  
34  
35  
36  
37  
38  
39  
40  
41  
42  
43  
44  
45  
46  
47

## Supportive care needs of men with advanced prostate cancer

|                   |                                                                                                                                                                                                                                                                                                                                                                                                                                                                                                                                                                                                                                                                                                                                                                                                                                                                                                                                                                                                                                                                                                                                                                                                                                                                                                                                                                                                                                                                                                                                                                                                                                                                                                                                                                                                                                                                                                                                                                                                                                                                 |
|-------------------|-----------------------------------------------------------------------------------------------------------------------------------------------------------------------------------------------------------------------------------------------------------------------------------------------------------------------------------------------------------------------------------------------------------------------------------------------------------------------------------------------------------------------------------------------------------------------------------------------------------------------------------------------------------------------------------------------------------------------------------------------------------------------------------------------------------------------------------------------------------------------------------------------------------------------------------------------------------------------------------------------------------------------------------------------------------------------------------------------------------------------------------------------------------------------------------------------------------------------------------------------------------------------------------------------------------------------------------------------------------------------------------------------------------------------------------------------------------------------------------------------------------------------------------------------------------------------------------------------------------------------------------------------------------------------------------------------------------------------------------------------------------------------------------------------------------------------------------------------------------------------------------------------------------------------------------------------------------------------------------------------------------------------------------------------------------------|
| Acceptance        | <p>“I think acceptance. That would be the word that comes to mind. Not resignation, big difference in my mind between resignation and acceptance, but okay, I accept it, to live a bit longer, or feel a bit better. This is what happens, I've just got to come to terms with it the best way I can. I didn't handle it too well. I think even at that age, you think you're indestructible. Gees, it did happen. But, it's not the end of the world and that's the attitudinal part, I think, more so than – attitude in retrospect, acceptance and spirituality part of it...I can possibly liken it, sort of, something akin to grief counselling is what I needed. You know, there's anger, there's frustration, everything. The whole gambit. It's all there. It's like, okay, it's passed away now, you know, let it rest...I just assumed, pop a couple of Viagra, you'll be right. But, no. So, yeah, it's – yeah and that's a problem after being very active for such a long time with a beautiful wife, it's really hard, really hard to take.” (P30)</p>                                                                                                                                                                                                                                                                                                                                                                                                                                                                                                                                                                                                                                                                                                                                                                                                                                                                                                                                                                                           |
| Masculinity       | <p>“Partly, I think, the reluctance of men to talk about their health, or to talk about personal issues that the idea of maleness, being able to be stoic and cope, type of thing. And just in the idea of maleness, that, sort of, men don't cry, men are stoic, or you get on and cope with things, a lot of men have not been exposed to talking about personal matters and so find it difficult to do that.” (P9)</p>                                                                                                                                                                                                                                                                                                                                                                                                                                                                                                                                                                                                                                                                                                                                                                                                                                                                                                                                                                                                                                                                                                                                                                                                                                                                                                                                                                                                                                                                                                                                                                                                                                       |
| Treatment effects | <p>“I'm impotent, and that – put it this way, that's – honestly, that's something that I have an extremely hard time coming to terms with. My wife and I had a fantastic sex life but that's gone and there's now – yeah, it's probably as much my fault as hers but there's just nothing left of our marriage; we live together but that's about it.” (P38)</p> <p>“I can't even walk down the beach, put out – not having to urinate a couple of times, I take my dog for a pretty long walk each day and I'm looking over my shoulder and I'm always thinking one day I'm going to get busted and someone's going to call me a dirty old man and are they going to even be prepared to listen to the fact that I've had prostate cancer and it's not my fault?” (P14)</p> <p>“Eating is a problem, I have a problem eating. I don't really want to eat but I more or less force myself to eat, because I have no energy, but I've lost, I think, it's 40 kilos all together, but that's over a period. When I look in the mirror I see this gaunt face looking at – I thought I was fairly good looking for an old bloke but now I really look bloody painful, I take notice, like, god I'm gaunt. And I really am thin.” (P19)</p> <p>“The general fatigue, loss of energy, loss of muscle tone, the hormonal issues were probably the biggest ones. I've got osteoporosis because – it's only at the early stage, but my bone density is checked regularly, but it's dropping slowly even though I do exercise, walk a lot and keep my weight down and exercises up. I do that sort of thing all the time. But I'm probably holding it in check. But that one's always a bit of a concern. I've got to be careful I don't fall off the roof, I don't do something, don't break anything nowadays. In fact I – when I finished radiation therapy I felt all pretty smart and I went running on the rocks at the beach one day, and jumped from one rock to another, and snapped my ankle so badly it had to be screwed up with screws and braces.” (P5)</p> |

## Supportive care needs of men with advanced prostate cancer

---

“I now have gynecomastia which I’ve discussed with my GP and my specialist. I was looking at having my breasts removed, unfortunately which I would’ve had to pay for, but I was told that if I did, they would come back so it would be a waste of time and effort and money doing it.” (P38)

“I know the cancer’s spreading. I woke up this morning about 4 o’clock with pains in my pelvic, where it is, the pelvic bone where I suspect the cancer’s moving to. They said it would at the Cancer Clinic, so that gave me a bit of pain. But I find if I take Panadol, one of these Panadols – I take two at night and two in the morning and two midday, I keep the pain at a level that’s quite acceptable. But I didn’t take it last night and then I woke up at 4 o’clock and thought, oh, what’s going on here.” (P23)

“I mean one of the biggest impacts is financial loss and that is not discussed full stop. That’s when you’re diagnosed with a terminal illness and there is no cure. They can slow the disease down, which they’ve successfully done in my case. But because of the side effect of loss of testosterone, so you’ve got less energy, muscle wastage and all of that. And the end resulted in me – I had to give up work. Now, that financial loss has been – made a big impact on my retirement and everything else.” (P3)

---

**Table 4**

Supportive care organising theme and super-ordinate themes

| <b>Super-ordinate theme</b> | <b>Exemplar quotes</b>                                                                                                                                                                                                                                                                                                                                                                                                                                                                                                                                                                                                                                                                                                                                                                                                                                                                                                                                                                                                                                                                                                                                                                                                                                                                                                                                                                                                                                 |
|-----------------------------|--------------------------------------------------------------------------------------------------------------------------------------------------------------------------------------------------------------------------------------------------------------------------------------------------------------------------------------------------------------------------------------------------------------------------------------------------------------------------------------------------------------------------------------------------------------------------------------------------------------------------------------------------------------------------------------------------------------------------------------------------------------------------------------------------------------------------------------------------------------------------------------------------------------------------------------------------------------------------------------------------------------------------------------------------------------------------------------------------------------------------------------------------------------------------------------------------------------------------------------------------------------------------------------------------------------------------------------------------------------------------------------------------------------------------------------------------------|
| Communication               | <p data-bbox="661 397 1919 527">“For me at my stage, or more advanced, or – I don’t know at what stage I’m at. Whether I’m advanced or reasonable, or what. I don’t have any – I don’t have any real – I don’t know what the symptoms are – if you do get advanced or more advanced, I don’t know what the symptoms are really. I have no information in that regard. I don’t know.” (P17)</p> <p data-bbox="661 560 1919 657">“He’s not exactly verbose, he doesn’t say a great deal. And I got put on Drug Z and was more or less left to my own devices with my GP who I don’t think he’d ever heard of it and it wasn’t really until about three or four months ago that we managed to sort out how the injections should be given.” (P10)</p> <p data-bbox="661 690 1919 868">“Openness, I think, for me for the treatment options. Probably the side effects were less discussed or less publicised. There was some, particularly in the radiation process, you could get burning, you could get itching, this, or that, but then later on you find out there was some others that they didn’t mention...On that score, I think there’s some minor explanation, you will get tireder, you will get hot flushes, but no advice - what can you do about a hot flush; go and have a cold shower. There’s been nothing on that, and in terms of maybe a medication, is there something will help as it does for ladies, I’ve got no idea.” (P35)</p> |
| Care Coordination           | <p data-bbox="661 901 1919 1096">“You just get the impression going through the process that the different stages of the process all have their own people, their own separate team altogether. I guess, I could sum it up in a word and that’s coordination with all the different treatments and tests and results and everything to do with the treatment, all those things are there obviously, patients are being treated for a long, long time, but having been through the process I just find that even though you end up getting through it it’s a bit of a minefield for the patient because they haven’t got a clue really what’s involved, what’s coming next, what you’ve got to do.” (P20)</p> <p data-bbox="661 1128 1919 1226">“It’s got to be the doctors. The doctors, I think, it has to start at the GP level and go right through. This is, as I say, this is your life and they’re doing the journey with you. That’s a good way of putting it, they’re doing the journey with you.” (P15)</p> <p data-bbox="661 1258 1919 1347">“I’d say ideally at time of diagnosis, after you talk to the doctor the next step would be the prostate cancer nurse. Yeah. Into the treatment part of it, yes, as part of the treatment process. But, in some ways, I think, that if you’ve got, say, sort of a trusted person, so if it’s a prostate cancer nurse providing good information and directing</p>                                |

## Supportive care needs of men with advanced prostate cancer

traffic, type of thing, and putting people in touch with resources, I think, that's probably going to help to overcome the difficulties." (P9)

"I think this support idea needs to be built in at diagnosis level into the, well, the doctors would present this as, "This is a natural part of the treatment, we're not saying go there if we think you need it, you have been diagnosed with cancer, you need it, we would strongly recommend you take your – take the benefit of going to a group for," I don't know how many meetings, but a few. And I also think that - how you do it I don't know, but that it gets presented – it is presented to men as, "This is what you do, there is no loss of dignity in going and talking over your problems with people who are in the state – in the same position as you are." (P39)

## Accessible care

"Well I'm up in the country and when I got diagnosed there was really no services in my town and it was a, you know an hour and a half trip to the closest place where could get anything done... Well they certainly – they didn't even have chemotherapy services here. And they didn't have helpers such as prostate nurses etcetera, people that were specifically trained in this sort of cancer. My oncologist, my urologists are all down in Melbourne. I mean they're two hours away in a motor car." (P34)

"It's about \$40,000 a year. I think it's about four to 12, about \$4,000 a month I think. Which the majority of people can't afford anyway. So he's got a number of other drugs, too. But that's the one he'd like to use next for me. So we've got to deal with that when we get there." (P5)

"I definitely would [go to another support group]. The problem is I can't drive anywhere at the moment because of some of the drugs I'm on; so it makes it very difficult for me to get anywhere. And now the closest group other than this one, even that one I had to go by car, but the next area's group is probably about twice the distance away and nowhere near public transport." (P27)

## Shared experience/peer support

"And I think that's – the big help that people need, and they are finding it here because they come to support group, it's looking for some comfort, I think, or some advice, or to talk to someone who's been there and done that. I think that a lot of trouble with the GPs and the surgeons, they – a lot of them don't have that first-hand experience, even though they work with it every day of their lives they don't – they haven't had the actual experience of living with the disease first-hand anyway." (P5)

"I think if you had someone or a little group of people who could meet and talk and have – maybe even in a coffee shop, have a cup of coffee, even the pub, have a beer or coffee or something and discuss your problems because that's where you'll find out that most of the people have problems the same as you. You get some men together, you can have someone facilitate it at first, then you just leave them and come back later on." (P19)

## Supportive care needs of men with advanced prostate cancer

1  
2  
3  
4  
5  
6  
7  
8  
9  
10  
11  
12  
13  
14  
15  
16  
17  
18  
19  
20  
21  
22  
23  
24  
25  
26  
27  
28  
29  
30  
31  
32  
33  
34  
35  
36  
37  
38  
39  
40  
41  
42  
43  
44  
45  
46  
47

---

“Yeah, well face-to-face is the best way, but yeah, online, why not? Particularly with people in the country, assuming they know how to go online and handle IT and all that sort of thing. Yeah, somebody or some group of people that they can contact who do have the experience and have the understanding.” (P21)

“From a personal standpoint of view, the normal sort of prostate cancer support group hasn’t been of any real benefit to myself or my wife. And the reason advanced prostate cancer for now, based in south east Queensland, which covers all of Australia and we have a monthly telephone conference and that is, yeah that’s quite beneficial. Because everybody in it has got advanced prostate cancer. It’s just that yeah, I’ve got advanced metastatic prostate cancer and that’s what this group is particular for, for men with advanced. Because we joke and say we among ourselves, “Dead Men Walking Club.” Warped sense of humour...” (P3)

“And, I know, I found going to the support group, I walked into the room, I sat by myself and I didn’t sort of mix with the other men, but that unfortunately is me. I’m not a mixer, I’m not a conversationalist, although I seem to be talking pretty well to you. So I found them, it felt a bit uncomfortable. For those who have been there a long time, they were starting to hear the same thing over and over again. So I guess that might have been why I terminated going, one of the reasons. Very well run group, I just lost, I felt I was getting no benefit out of it and I wasn’t really comfortable there. That’s me, my particular makeup you can understand.” (P6)

---

Involvement of partner/family

“She (wife) senses my feelings, my moods, and she can tell if I’m feeling a bit negative by my comments or my talk, or mostly my body language. And she doesn’t beat around the bush, she just tells me to snap out of it, or, “Pull yourself together,” or “get yourself sorted”. Why don’t you do this, or why don’t you do that?” She doesn’t muck around, she really socks it to me, which is really good, it’s what I need. And I know that a lot of men say the same thing, they are always grateful for their partners in many, many cases, and we really live a lot longer with good wives, I can assure you. My wife is definitely the pinnacle. She’s the main support there.” (P5)

“So, I get help with transport and I have someone come and help me clean once a fortnight and that, but I probably need help with shopping, but I have friends who will go and do the shopping or take me shopping. So, I’m fairly well off in that regard. ...So, yeah, it’s good to have someone who will help you, you don’t want them mothering you, but take you and if I needed shopping we would go shopping after we’d been to the gym, heavy shopping, I need it, and bring it home.” (P19)

---

1  
2  
3  
4  
5  
6  
7  
8  
9  
10  
11  
12  
13  
14  
15  
16  
17  
18  
19  
20  
21  
22  
23  
24  
25  
26  
27  
28  
29  
30  
31  
32  
33  
34  
35  
36  
37  
38  
39  
40  
41  
42  
43  
44  
45  
46  
47  
48  
49  
50  
51  
52  
53  
54  
55  
56  
57  
58  
59  
60

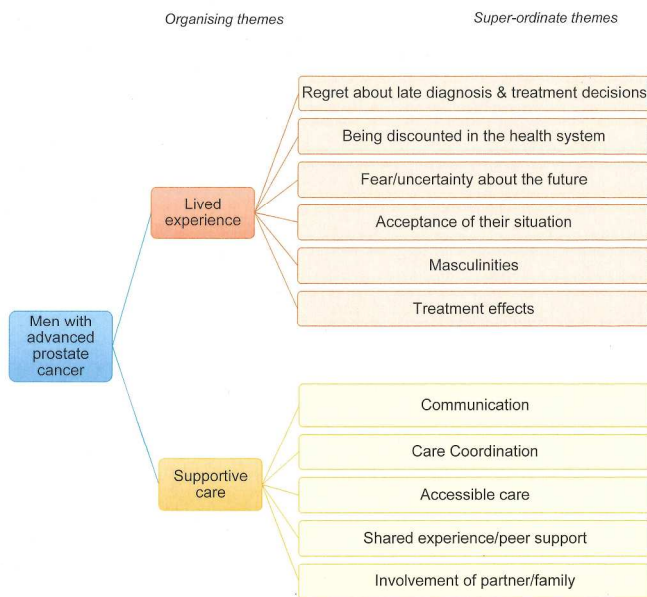

Figure 1. Coding structure derived from thematic analysis

Coding structure derived from thematic analysis

297x420mm (300 x 300 DPI)
